# Supplementary material for: CD229 interacts with RASAL3 to activate RAS/ERK pathway in multiple myeloma proliferation
Source: publisher site journal article supplement (doi:10.18632/aging.204405), 2022-11-28
Supplement: Supplementary file [file aging-v14i22-204405-supplementary-material-SD1.pdf]

SUPPLEMENTARY FIGURE

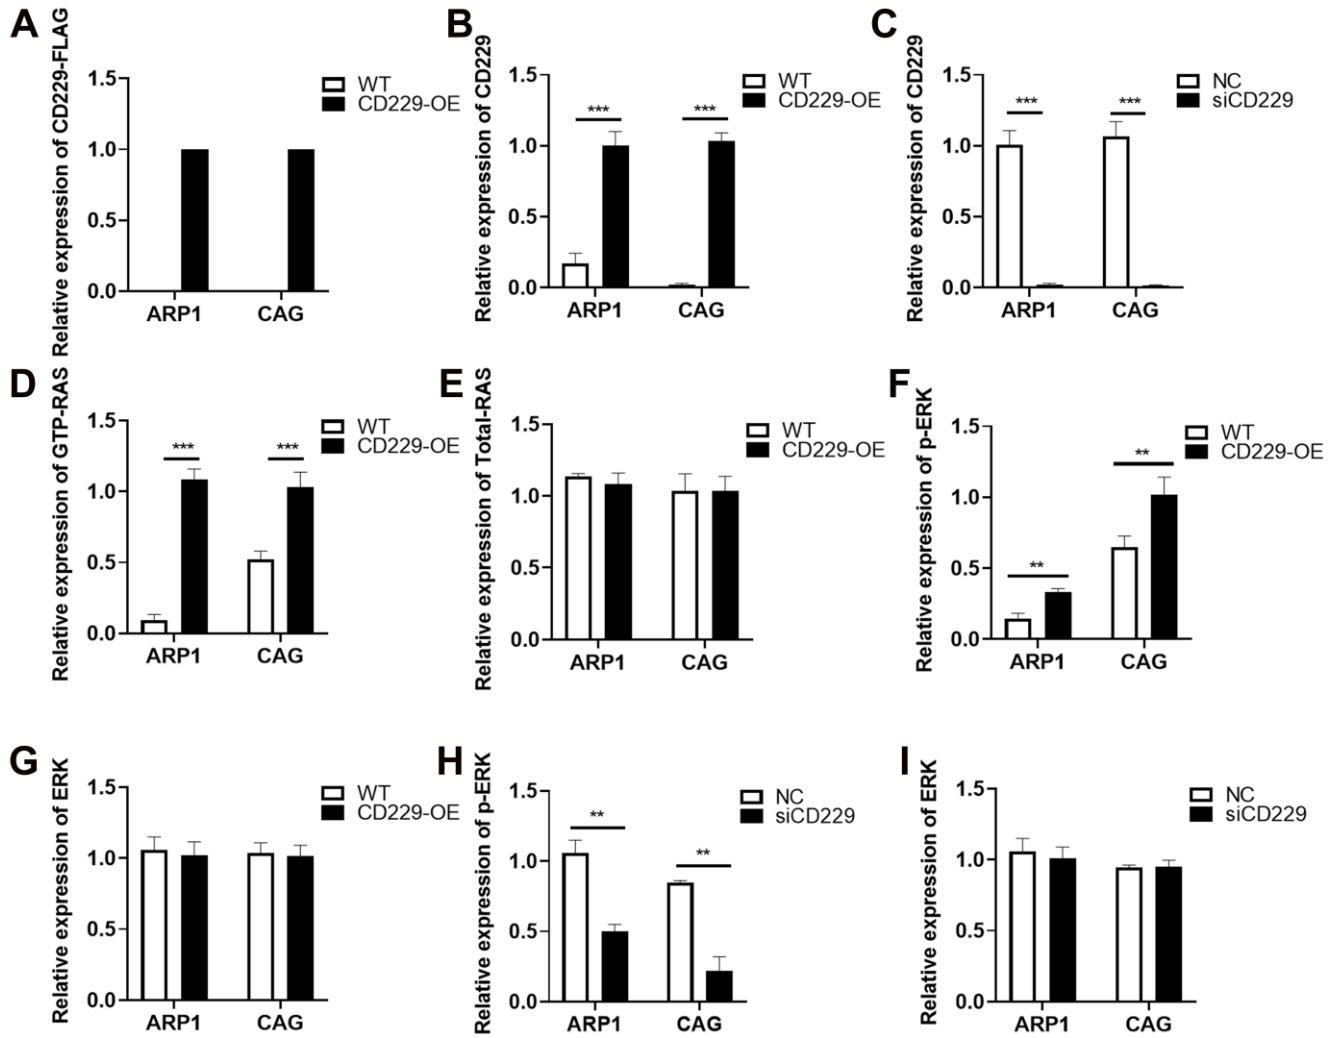

**Supplementary Figure 1. The quantitative analyses of WB assays for the indicated protein. (A, B)** Confirmation of CD229 expression in CD229-OE MM cells, related to Figure 2A. **(C)** Confirmation of CD229 expression in CD229-OE MM cells, related to Figure 2D. **(D)** Relative expression of RAS-GTP in WT and CD229-OE MM cells, related to Figure 3C. **(E)** Relative expression of Total-RAS in WT and CD229-OE MM cells, related to Figure 3C. **(F, G)** Relative expressions of p-ERK and ERK in CD229-OE MM cells, related to Figure 3D, respectively. **(H, I)** Relative expressions of p-ERK and ERK in siCD229 MM cells, related to Figure 3E, respectively.
