# Supplementary material for: CD229 interacts with RASAL3 to activate RAS/ERK pathway in multiple myeloma proliferation
Source: Aging (Albany NY). 2022 Nov 28;14(22):9264–79. doi: 10.18632/aging.204405 (PMC9740379; doi:10.18632/aging.204405)
Supplement: Supplementary Table 1 [file aging-14-204405-s002.xlsx]

## Sheet: Sheet1
Supplementary Table 1. Statistics of top 30 enriched pathways.
pathway_id	pathway_name	S gene number	TS gene number	B gene number	TB gene number	pvalue
ko04144	Endocytosis	13	170	244	7775	0.00260384
ko04662	B cell receptor signaling pathway	6	170	70	7775	0.00412704
ko05214	Glioma	6	170	75	7775	0.00579646
ko05340	Primary immunodeficiency	4	170	36	7775	0.00753232
ko04014	Ras signaling pathway	11	170	231	7775	0.0122976
ko04962	Vasopressin-regulated water reabsorption	4	170	44	7775	0.0151731
ko04142	Lysosome	7	170	123	7775	0.0180038
ko00510	N-Glycan biosynthesis	4	170	50	7775	0.0232823
ko04630	Jak-STAT signaling pathway	8	170	162	7775	0.0254719
ko04060	Cytokine-cytokine receptor interaction	12	170	292	7775	0.0261373
ko01521	EGFR tyrosine kinase inhibitor resistance	5	170	79	7775	0.0289945
ko05169	Epstein-Barr virus infection	9	170	198	7775	0.0294037
ko04931	Insulin resistance	6	170	108	7775	0.0306931
ko05203	Viral carcinogenesis	9	170	200	7775	0.0310896
ko05418	Fluid shear stress and atherosclerosis	7	170	138	7775	0.0313853
ko04012	ErbB signaling pathway	5	170	84	7775	0.0364472
ko05200	Pathways in cancer	18	170	528	7775	0.039513
ko00250	Alanine, aspartate and glutamate metabolism	3	170	35	7775	0.0403164
ko04072	Phospholipase D signaling pathway	7	170	147	7775	0.0419961
ko00500	Starch and sucrose metabolism	3	170	36	7775	0.0432968
ko05034	Alcoholism	8	170	180	7775	0.0434959
ko05202	Transcriptional misregulation in cancer	8	170	185	7775	0.0497036
ko05230	Central carbon metabolism in cancer	4	170	65	7775	0.0533662
ko05223	Non-small cell lung cancer	4	170	66	7775	0.0558806
ko05221	Acute myeloid leukemia	4	170	66	7775	0.0558806
ko05146	Amoebiasis	5	170	95	7775	0.0566772
ko05211	Renal cell carcinoma	4	170	68	7775	0.0610982
ko00531	Glycosaminoglycan degradation	2	170	19	7775	0.0637314
ko05322	Systemic lupus erythematosus	6	170	130	7775	0.0650928
ko00532	Glycosaminoglycan biosynthesis - chondroitin sulfate / dermatan sulfate	2	170	20	7775	0.0698231
ko04068	FoxO signaling pathway	6	170	133	7775	0.0710391
ko02010	ABC transporters	3	170	45	7775	0.0747779
ko00220	Arginine biosynthesis	2	170	21	7775	0.0760966
ko04915	Estrogen signaling pathway	6	170	137	7775	0.0794402
ko04550	Signaling pathways regulating pluripotency of stem cells	6	170	139	7775	0.0838423
ko00330	Arginine and proline metabolism	3	170	49	7775	0.0912629
ko04810	Regulation of actin cytoskeleton	8	170	214	7775	0.0967971
ko01040	Biosynthesis of unsaturated fatty acids	2	170	27	7775	0.116977
ko00062	Fatty acid elongation	2	170	27	7775	0.116977
ko05160	Hepatitis C	6	170	155	7775	0.123759
ko00750	Vitamin B6 metabolism	1	170	6	7775	0.124262
ko04658	Th1 and Th2 cell differentiation	4	170	90	7775	0.133985
ko04380	Osteoclast differentiation	5	170	125	7775	0.138342
ko04650	Natural killer cell mediated cytotoxicity	5	170	126	7775	0.141677
ko04217	Necroptosis	6	170	162	7775	0.143714
ko04912	GnRH signaling pathway	4	170	93	7775	0.145886
ko05205	Proteoglycans in cancer	7	170	201	7775	0.150864
ko04122	Sulfur relay system	1	170	8	7775	0.162171
ko00740	Riboflavin metabolism	1	170	8	7775	0.162171
ko05215	Prostate cancer	4	170	97	7775	0.162366
ko05150	Staphylococcus aureus infection	3	170	64	7775	0.164094
ko04015	Rap1 signaling pathway	7	170	206	7775	0.164711
ko04137	Mitophagy - animal	3	170	65	7775	0.169452
ko04070	Phosphatidylinositol signaling system	4	170	99	7775	0.170852
ko05231	Choline metabolism in cancer	4	170	99	7775	0.170852
ko04750	Inflammatory mediator regulation of TRP channels	4	170	100	7775	0.175152
ko04210	Apoptosis	5	170	136	7775	0.176864
ko05020	Prion diseases	2	170	35	7775	0.177626
ko04664	Fc epsilon RI signaling pathway	3	170	67	7775	0.180317
ko04620	Toll-like receptor signaling pathway	4	170	102	7775	0.183863
ko04910	Insulin signaling pathway	5	170	138	7775	0.184273
ko04922	Glucagon signaling pathway	4	170	103	7775	0.188272
ko04621	NOD-like receptor signaling pathway	6	170	177	7775	0.190984
ko04612	Antigen processing and presentation	3	170	69	7775	0.191365
ko04960	Aldosterone-regulated sodium reabsorption	2	170	37	7775	0.193479
ko04514	Cell adhesion molecules (CAMs)	5	170	144	7775	0.20716
ko04976	Bile secretion	3	170	72	7775	0.208246
ko05163	Human cytomegalovirus infection	7	170	223	7775	0.215705
ko00130	Ubiquinone and other terpenoid-quinone biosynthesis	1	170	11	7775	0.215996
ko00620	Pyruvate metabolism	2	170	40	7775	0.217571
ko04721	Synaptic vesicle cycle	3	170	78	7775	0.242914
ko04151	PI3K-Akt signaling pathway	10	170	353	7775	0.243708
ko04390	Hippo signaling pathway	5	170	154	7775	0.247202
ko04919	Thyroid hormone signaling pathway	4	170	116	7775	0.248299
ko03450	Non-homologous end-joining	1	170	13	7775	0.249955
ko04973	Carbohydrate digestion and absorption	2	170	44	7775	0.250052
ko04722	Neurotrophin signaling pathway	4	170	119	7775	0.262727
ko04218	Cellular senescence	5	170	158	7775	0.263764
ko05210	Colorectal cancer	3	170	86	7775	0.290399
ko05225	Hepatocellular carcinoma	5	170	166	7775	0.297597
ko04540	Gap junction	3	170	88	7775	0.302399
ko04978	Mineral absorption	2	170	51	7775	0.307067
ko04140	Autophagy - animal	4	170	129	7775	0.311804
ko00910	Nitrogen metabolism	1	170	17	7775	0.313548
ko04666	Fc gamma R-mediated phagocytosis	3	170	90	7775	0.314424
ko04010	MAPK signaling pathway	8	170	295	7775	0.317412
ko05166	Human T-cell leukemia virus 1 infection	6	170	217	7775	0.338132
ko04640	Hematopoietic cell lineage	3	170	94	7775	0.338498
ko00480	Glutathione metabolism	2	170	55	7775	0.339337
ko00770	Pantothenate and CoA biosynthesis	1	170	19	7775	0.343305
ko04371	Apelin signaling pathway	4	170	136	7775	0.346684
ko05416	Viral myocarditis	2	170	56	7775	0.347338
ko01522	Endocrine resistance	3	170	96	7775	0.350523
ko00240	Pyrimidine metabolism	2	170	57	7775	0.355307
ko05162	Measles	4	170	138	7775	0.356677
ko04925	Aldosterone synthesis and secretion	3	170	98	7775	0.362526
ko05213	Endometrial cancer	2	170	58	7775	0.363242
ko04370	VEGF signaling pathway	2	170	59	7775	0.371141
ko04066	HIF-1 signaling pathway	3	170	100	7775	0.374496
ko05167	Kaposi sarcoma-associated herpesvirus infection	5	170	186	7775	0.384464
ko05168	Herpes simplex virus 1 infection	12	170	490	7775	0.384963
ko00514	Other types of O-glycan biosynthesis	1	170	22	7775	0.385552
ko00561	Glycerolipid metabolism	2	170	61	7775	0.386819
ko04020	Calcium signaling pathway	5	170	187	7775	0.388833
ko00515	Mannose type O-glycan biosynthesis	1	170	23	7775	0.399025
ko04964	Proximal tubule bicarbonate reclamation	1	170	23	7775	0.399025
ko05217	Basal cell carcinoma	2	170	63	7775	0.402327
ko05321	Inflammatory bowel disease (IBD)	2	170	63	7775	0.402327
ko04659	Th17 cell differentiation	3	170	105	7775	0.404213
ko04145	Phagosome	4	170	148	7775	0.40652
ko04932	Non-alcoholic fatty liver disease (NAFLD)	4	170	149	7775	0.411475
ko00534	Glycosaminoglycan biosynthesis - heparan sulfate / heparin	1	170	24	7775	0.412204
ko04150	mTOR signaling pathway	4	170	152	7775	0.426287
ko04720	Long-term potentiation	2	170	67	7775	0.432771
ko04668	TNF signaling pathway	3	170	110	7775	0.433521
ko05165	Human papillomavirus infection	8	170	330	7775	0.434317
ko05031	Amphetamine addiction	2	170	68	7775	0.440255
ko04670	Leukocyte transendothelial migration	3	170	112	7775	0.445101
ko04924	Renin secretion	2	170	69	7775	0.447684
ko00010	Glycolysis / Gluconeogenesis	2	170	69	7775	0.447684
ko00601	Glycosphingolipid biosynthesis - lacto and neolacto series	1	170	27	7775	0.450043
ko04622	RIG-I-like receptor signaling pathway	2	170	70	7775	0.455059
ko04917	Prolactin signaling pathway	2	170	70	7775	0.455059
ko04920	Adipocytokine signaling pathway	2	170	70	7775	0.455059
ko04744	Phototransduction	1	170	28	7775	0.46211
ko00650	Butanoate metabolism	1	170	28	7775	0.46211
ko05218	Melanoma	2	170	72	7775	0.469638
ko01524	Platinum drug resistance	2	170	72	7775	0.469638
ko04115	p53 signaling pathway	2	170	72	7775	0.469638
ko05206	MicroRNAs in cancer	7	170	299	7775	0.481927
ko03320	PPAR signaling pathway	2	170	74	7775	0.483984
ko05100	Bacterial invasion of epithelial cells	2	170	74	7775	0.483984
ko00562	Inositol phosphate metabolism	2	170	74	7775	0.483984
ko00030	Pentose phosphate pathway	1	170	30	7775	0.485459
ko00630	Glyoxylate and dicarboxylate metabolism	1	170	30	7775	0.485459
ko00760	Nicotinate and nicotinamide metabolism	1	170	30	7775	0.485459
ko05170	Human immunodeficiency virus 1 infection	5	170	210	7775	0.487905
ko04971	Gastric acid secretion	2	170	75	7775	0.491067
ko05212	Pancreatic cancer	2	170	75	7775	0.491067
ko04024	cAMP signaling pathway	5	170	212	7775	0.496295
ko04710	Circadian rhythm	1	170	31	7775	0.496753
ko01523	Antifolate resistance	1	170	31	7775	0.496753
ko03020	RNA polymerase	1	170	31	7775	0.496753
ko05133	Pertussis	2	170	76	7775	0.498089
ko05220	Chronic myeloid leukemia	2	170	76	7775	0.498089
ko04136	Autophagy - other	1	170	32	7775	0.5078
ko00640	Propanoate metabolism	1	170	32	7775	0.5078
ko05164	Influenza A	4	170	169	7775	0.508009
ko04114	Oocyte meiosis	3	170	124	7775	0.512419
ko00051	Fructose and mannose metabolism	1	170	33	7775	0.518607
ko04610	Complement and coagulation cascades	2	170	79	7775	0.518783
ko04130	SNARE interactions in vesicular transport	1	170	34	7775	0.529177
ko05152	Tuberculosis	4	170	175	7775	0.53564
ko05330	Allograft rejection	1	170	35	7775	0.539517
ko05132	Salmonella infection	2	170	84	7775	0.551999
ko04146	Peroxisome	2	170	85	7775	0.558446
ko05332	Graft-versus-host disease	1	170	37	7775	0.559524
ko04911	Insulin secretion	2	170	86	7775	0.564828
ko05323	Rheumatoid arthritis	2	170	87	7775	0.571145
ko04727	GABAergic synapse	2	170	89	7775	0.583578
ko04062	Chemokine signaling pathway	4	170	188	7775	0.592728
ko03015	mRNA surveillance pathway	2	170	91	7775	0.595746
ko04970	Salivary secretion	2	170	91	7775	0.595746
ko04350	TGF-beta signaling pathway	2	170	91	7775	0.595746
ko05219	Bladder cancer	1	170	41	7775	0.596982
ko04975	Fat digestion and absorption	1	170	41	7775	0.596982
ko04940	Type I diabetes mellitus	1	170	41	7775	0.596982
ko04064	NF-kappa B signaling pathway	2	170	93	7775	0.607647
ko04657	IL-17 signaling pathway	2	170	93	7775	0.607647
ko04261	Adrenergic signaling in cardiomyocytes	3	170	145	7775	0.618926
ko03022	Basal transcription factors	1	170	44	7775	0.622982
ko05224	Breast cancer	3	170	147	7775	0.628216
ko00564	Glycerophospholipid metabolism	2	170	97	7775	0.630654
ko05226	Gastric cancer	3	170	148	7775	0.632802
ko04510	Focal adhesion	4	170	198	7775	0.633742
ko04914	Progesterone-mediated oocyte maturation	2	170	98	7775	0.63624
ko04672	Intestinal immune network for IgA production	1	170	46	7775	0.639381
ko04933	AGE-RAGE signaling pathway in diabetic complications	2	170	100	7775	0.647214
ko04660	T cell receptor signaling pathway	2	170	100	7775	0.647214
ko00600	Sphingolipid metabolism	1	170	47	7775	0.647313
ko04930	Type II diabetes mellitus	1	170	47	7775	0.647313
ko04916	Melanogenesis	2	170	101	7775	0.652603
ko00520	Amino sugar and nucleotide sugar metabolism	1	170	48	7775	0.655071
ko05144	Malaria	1	170	48	7775	0.655071
ko00270	Cysteine and methionine metabolism	1	170	48	7775	0.655071
ko04961	Endocrine and other factor-regulated calcium reabsorption	1	170	48	7775	0.655071
ko04330	Notch signaling pathway	1	170	48	7775	0.655071
ko04921	Oxytocin signaling pathway	3	170	153	7775	0.65515
ko05142	Chagas disease (American trypanosomiasis)	2	170	102	7775	0.657926
ko04625	C-type lectin receptor signaling pathway	2	170	104	7775	0.668379
ko05110	Vibrio cholerae infection	1	170	50	7775	0.670083
ko05320	Autoimmune thyroid disease	1	170	50	7775	0.670083
ko04979	Cholesterol metabolism	1	170	50	7775	0.670083
ko04928	Parathyroid hormone synthesis, secretion and action	2	170	106	7775	0.678574
ko05161	Hepatitis B	3	170	163	7775	0.696897
ko05134	Legionellosis	1	170	55	7775	0.70483
ko05130	Pathogenic Escherichia coli infection	1	170	55	7775	0.70483
ko04022	cGMP-PKG signaling pathway	3	170	166	7775	0.708656
ko04923	Regulation of lipolysis in adipocytes	1	170	56	7775	0.71133
ko04724	Glutamatergic synapse	2	170	114	7775	0.716831
ko04071	Sphingolipid signaling pathway	2	170	119	7775	0.73876
ko00140	Steroid hormone biosynthesis	1	170	61	7775	0.741756
ko04152	AMPK signaling pathway	2	170	121	7775	0.74712
ko04623	Cytosolic DNA-sensing pathway	1	170	62	7775	0.747447
ko04213	Longevity regulating pathway - multiple species	1	170	63	7775	0.753013
ko04360	Axon guidance	3	170	180	7775	0.758958
ko04611	Platelet activation	2	170	124	7775	0.759232
ko05131	Shigellosis	1	170	65	7775	0.763783
ko05120	Epithelial cell signaling in Helicobacter pylori infection	1	170	68	7775	0.779068
ko04926	Relaxin signaling pathway	2	170	130	7775	0.781964
ko00982	Drug metabolism - cytochrome P450	1	170	69	7775	0.783941
ko00230	Purine metabolism	2	170	132	7775	0.789115
ko04270	Vascular smooth muscle contraction	2	170	132	7775	0.789115
ko04728	Dopaminergic synapse	2	170	132	7775	0.789115
ko04520	Adherens junction	1	170	72	7775	0.797929
ko00980	Metabolism of xenobiotics by cytochrome P450	1	170	73	7775	0.802389
ko04918	Thyroid hormone synthesis	1	170	74	7775	0.80675
ko04120	Ubiquitin mediated proteolysis	2	170	138	7775	0.809349
ko00983	Drug metabolism - other enzymes	1	170	78	7775	0.823261
ko04260	Cardiac muscle contraction	1	170	78	7775	0.823261
ko03018	RNA degradation	1	170	79	7775	0.827164
ko05204	Chemical carcinogenesis	1	170	82	7775	0.838368
ko04974	Protein digestion and absorption	1	170	90	7775	0.864838
ko04211	Longevity regulating pathway	1	170	90	7775	0.864838
ko04934	Cushing syndrome	2	170	158	7775	0.864896
ko05222	Small cell lung cancer	1	170	93	7775	0.873612
ko04141	Protein processing in endoplasmic reticulum	2	170	165	7775	0.880559
ko04713	Circadian entrainment	1	170	97	7775	0.884436
ko04972	Pancreatic secretion	1	170	98	7775	0.886995
ko04530	Tight junction	2	170	171	7775	0.892639
ko04725	Cholinergic synapse	1	170	112	7775	0.917428
ko05012	Parkinson disease	1	170	142	7775	0.95793
ko04714	Thermogenesis	2	170	231	7775	0.964574
ko03010	Ribosome	1	170	151	7775	0.965653
ko04310	Wnt signaling pathway	1	170	158	7775	0.97067
ko05010	Alzheimer disease	1	170	171	7775	0.978134
ko05016	Huntington disease	1	170	193	7775	0.986712
ko04080	Neuroactive ligand-receptor interaction	2	170	339	7775	0.995809
ko04740	Olfactory transduction	1	170	440	7775	0.999955
