# Supplementary material for: CD229 interacts with RASAL3 to activate RAS/ERK pathway in multiple myeloma proliferation
Source: Aging (Albany NY). 2022 Nov 28;14(22):9264–79. doi: 10.18632/aging.204405 (PMC9740379; doi:10.18632/aging.204405)
Supplement: Supplementary Table 2 [file aging-14-204405-s003.xlsx]

## Sheet: Proteins
Supplementary Table 2. Co-IP/MS data of the selected 561 proteins co-immunoprecipitated with CD229.
Protein FDR Confidence	Accession	Description	Sum PEP Score	Coverage	# Peptides	# PSMs	# Unique Peptides	# AAs	MW [kDa]	calc. pI	Score Sequest HT
High	P35579	Myosin-9 OS=Homo sapiens GN=MYH9 PE=1 SV=4	1474.12	57.9082	133	495	112	1960	226.392	5.6	1196.51
High	P35580	Myosin-10 OS=Homo sapiens GN=MYH10 PE=1 SV=3	816.082	51.4676	110	210	91	1976	228.858	5.54	501.094
High	O75643	U5 small nuclear ribonucleoprotein 200 kDa helicase OS=Homo sapiens GN=SNRNP200 PE=1 SV=2	281.845	31.882	62	81	62	2136	244.353	6.06	144.71
High	O75165	DnaJ homolog subfamily C member 13 OS=Homo sapiens GN=DNAJC13 PE=1 SV=5	281.417	31.2528	65	80	65	2243	254.252	6.74	136.151
High	Q6P2Q9	Pre-mRNA-processing-splicing factor 8 OS=Homo sapiens GN=PRPF8 PE=1 SV=2	278.99	30.364	64	87	64	2335	273.427	8.84	139.74
High	P04264	Keratin, type II cytoskeletal 1 OS=Homo sapiens GN=KRT1 PE=1 SV=6	271.183	51.5528	36	150	29	644	65.999	8.12	347.564
High	P35908	Keratin, type II cytoskeletal 2 epidermal OS=Homo sapiens GN=KRT2 PE=1 SV=2	215.9	51.9562	36	93	26	639	65.393	8	188.4
High	P60709	Actin, cytoplasmic 1 OS=Homo sapiens GN=ACTB PE=1 SV=1	203.924	57.0667	20	122	7	375	41.71	5.48	259.152
High	P13645	Keratin, type I cytoskeletal 10 OS=Homo sapiens GN=KRT10 PE=1 SV=6	175.376	49.3151	32	106	26	584	58.792	5.21	218.955
High	P02768	Serum albumin OS=Homo sapiens GN=ALB PE=1 SV=2	153.729	46.6338	29	45	29	609	69.321	6.28	92.2426
High	O94906	Pre-mRNA-processing factor 6 OS=Homo sapiens GN=PRPF6 PE=1 SV=1	152.442	34.4315	32	40	32	941	106.858	8.25	90.7717
High	P11142	Heat shock cognate 71 kDa protein OS=Homo sapiens GN=HSPA8 PE=1 SV=1	149.772	35.1393	23	40	20	646	70.854	5.52	95.4358
High	P35527	Keratin, type I cytoskeletal 9 OS=Homo sapiens GN=KRT9 PE=1 SV=3	149.75	39.9679	22	76	21	623	62.027	5.24	158.278
High	Q15029	116 kDa U5 small nuclear ribonucleoprotein component OS=Homo sapiens GN=EFTUD2 PE=1 SV=1	141.069	29.4239	25	37	25	972	109.366	5	73.4363
High	O43290	U4/U6.U5 tri-snRNP-associated protein 1 OS=Homo sapiens GN=SART1 PE=1 SV=1	140.38	41.25	27	35	27	800	90.2	6.13	80.9303
High	P13647	Keratin, type II cytoskeletal 5 OS=Homo sapiens GN=KRT5 PE=1 SV=3	130.204	39.4915	31	51	17	590	62.34	7.74	108.301
High	P46940	Ras GTPase-activating-like protein IQGAP1 OS=Homo sapiens GN=IQGAP1 PE=1 SV=1	125.385	18.8896	27	32	27	1657	189.134	6.48	56.3987
High	P11021	78 kDa glucose-regulated protein OS=Homo sapiens GN=HSPA5 PE=1 SV=2	117.066	38.9908	22	29	20	654	72.288	5.16	54.8008
High	P02533	Keratin, type I cytoskeletal 14 OS=Homo sapiens GN=KRT14 PE=1 SV=4	112.818	52.9661	24	49	6	472	51.529	5.16	99.8392
High	Q2NL82	Pre-rRNA-processing protein TSR1 homolog OS=Homo sapiens GN=TSR1 PE=1 SV=1	112.667	27.4876	19	31	19	804	91.752	7.42	58.393
High	Q86YZ3	Hornerin OS=Homo sapiens GN=HRNR PE=1 SV=2	107.136	13.7544	10	17	10	2850	282.228	10.04	67.022
High	P55081	Microfibrillar-associated protein 1 OS=Homo sapiens GN=MFAP1 PE=1 SV=2	98.5491	32.8018	11	19	11	439	51.927	4.98	44.2259
High	P02538	Keratin, type II cytoskeletal 6A OS=Homo sapiens GN=KRT6A PE=1 SV=3	96.3405	37.4113	27	44	3	564	60.008	8	90.6218
High	P68032	Actin, alpha cardiac muscle 1 OS=Homo sapiens GN=ACTC1 PE=1 SV=1	96.2198	30.2387	12	89	1	377	41.992	5.39	151.264
High	P04259	Keratin, type II cytoskeletal 6B OS=Homo sapiens GN=KRT6B PE=1 SV=5	96.1297	37.4113	27	49	3	564	60.03	8	101.254
High	Q86YV0	RAS protein activator like-3 OS=Homo sapiens GN=RASAL3 PE=1 SV=2	92.5013	27.4975	22	27	22	1011	111.829	8.75	53.4118
High	Q92974	Rho guanine nucleotide exchange factor 2 OS=Homo sapiens GN=ARHGEF2 PE=1 SV=4	87.1151	28.6004	24	28	24	986	111.473	7.27	46.5726
High	P08779	Keratin, type I cytoskeletal 16 OS=Homo sapiens GN=KRT16 PE=1 SV=4	85.4298	44.186	21	41	8	473	51.236	5.05	82.5316
High	Q9UDY2	Tight junction protein ZO-2 OS=Homo sapiens GN=TJP2 PE=1 SV=2	83.5651	25.3782	27	29	27	1190	133.876	7.4	55.1904
High	O00566	U3 small nucleolar ribonucleoprotein protein MPP10 OS=Homo sapiens GN=MPHOSPH10 PE=1 SV=2	78.9094	20.558	13	17	13	681	78.816	4.86	36.4794
High	O43395	U4/U6 small nuclear ribonucleoprotein Prp3 OS=Homo sapiens GN=PRPF3 PE=1 SV=2	78.0986	31.3324	18	24	18	683	77.481	9.5	43.911
High	P11171	Protein 4.1 OS=Homo sapiens GN=EPB41 PE=1 SV=4	75.4034	26.3889	17	20	17	864	96.957	5.58	40.764
High	Q13813	Spectrin alpha chain, non-erythrocytic 1 OS=Homo sapiens GN=SPTAN1 PE=1 SV=3	69.7463	9.06149	19	19	19	2472	284.364	5.35	35.4472
High	P67936	Tropomyosin alpha-4 chain OS=Homo sapiens GN=TPM4 PE=1 SV=3	67.3558	36.2903	13	19	9	248	28.504	4.69	44.5501
High	P38646	Stress-70 protein, mitochondrial OS=Homo sapiens GN=HSPA9 PE=1 SV=2	64.3914	32.106	17	18	17	679	73.635	6.16	37.6648
High	Q04695	Keratin, type I cytoskeletal 17 OS=Homo sapiens GN=KRT17 PE=1 SV=2	63.8563	37.5	18	32	6	432	48.076	5.02	62.5999
High	Q9BUQ8	Probable ATP-dependent RNA helicase DDX23 OS=Homo sapiens GN=DDX23 PE=1 SV=3	63.4572	22.6829	17	21	17	820	95.524	9.55	25.4345
High	P06753	Tropomyosin alpha-3 chain OS=Homo sapiens GN=TPM3 PE=1 SV=2	62.9731	28.4211	12	22	8	285	32.93	4.72	40.0687
High	Q9UHX1	Poly(U)-binding-splicing factor PUF60 OS=Homo sapiens GN=PUF60 PE=1 SV=1	61.2296	33.0948	16	20	16	559	59.838	5.29	31.5641
High	P61247	40S ribosomal protein S3a OS=Homo sapiens GN=RPS3A PE=1 SV=2	60.8499	48.8636	14	21	14	264	29.926	9.73	32.0921
High	Q02413	Desmoglein-1 OS=Homo sapiens GN=DSG1 PE=1 SV=2	60.7068	15.6339	12	15	12	1049	113.676	5.03	34.1837
High	Q6S8J3	POTE ankyrin domain family member E OS=Homo sapiens GN=POTEE PE=1 SV=3	55.35	7.44186	7	42	1	1075	121.286	6.2	91.4188
High	P08238	Heat shock protein HSP 90-beta OS=Homo sapiens GN=HSP90AB1 PE=1 SV=4	54.4332	19.337	12	14	6	724	83.212	5.03	26.1188
High	P62701	40S ribosomal protein S4, X isoform OS=Homo sapiens GN=RPS4X PE=1 SV=2	54.1442	44.1065	12	17	12	263	29.579	10.15	36.2043
High	Q15459	Splicing factor 3A subunit 1 OS=Homo sapiens GN=SF3A1 PE=1 SV=1	53.8968	22.9508	14	15	14	793	88.831	5.22	25.1212
High	P15924	Desmoplakin OS=Homo sapiens GN=DSP PE=1 SV=3	53.2747	6.93138	20	20	20	2871	331.569	6.81	28.4336
High	Q7Z406	Myosin-14 OS=Homo sapiens GN=MYH14 PE=1 SV=2	52.6057	5.66416	14	30	1	1995	227.732	5.6	68.537
High	Q9UH99	SUN domain-containing protein 2 OS=Homo sapiens GN=SUN2 PE=1 SV=3	51.09	17.9916	9	14	9	717	80.262	6.73	21.4751
High	P15311	Ezrin OS=Homo sapiens GN=EZR PE=1 SV=4	50.8498	16.5529	11	13	6	586	69.37	6.27	28.3091
High	P17844	Probable ATP-dependent RNA helicase DDX5 OS=Homo sapiens GN=DDX5 PE=1 SV=1	50.7112	19.8697	12	15	8	614	69.105	8.92	25.6068
High	P26038	Moesin OS=Homo sapiens GN=MSN PE=1 SV=3	50.4059	23.3969	16	19	11	577	67.778	6.4	26.3326
High	Q14980	Nuclear mitotic apparatus protein 1 OS=Homo sapiens GN=NUMA1 PE=1 SV=2	49.0191	7.80142	13	14	13	2115	238.115	5.78	23.8078
High	O95466	Formin-like protein 1 OS=Homo sapiens GN=FMNL1 PE=1 SV=3	48.8108	15.5455	16	19	15	1100	121.777	5.72	28.7577
High	Q9NYL9	Tropomodulin-3 OS=Homo sapiens GN=TMOD3 PE=1 SV=1	48.7706	38.3523	12	14	12	352	39.57	5.19	25.7359
High	P07900	Heat shock protein HSP 90-alpha OS=Homo sapiens GN=HSP90AA1 PE=1 SV=5	48.4181	15.1639	10	12	4	732	84.607	5.02	21.5531
High	P68363	Tubulin alpha-1B chain OS=Homo sapiens GN=TUBA1B PE=1 SV=1	48.2744	33.7029	11	13	11	451	50.12	5.06	22.3225
High	P98171	Rho GTPase-activating protein 4 OS=Homo sapiens GN=ARHGAP4 PE=1 SV=2	47.9019	15.5391	11	11	11	946	104.96	6.34	24.7441
High	P68371	Tubulin beta-4B chain OS=Homo sapiens GN=TUBB4B PE=1 SV=1	47.3787	27.4157	10	17	3	445	49.799	4.89	28.3912
High	Q8WWY3	U4/U6 small nuclear ribonucleoprotein Prp31 OS=Homo sapiens GN=PRPF31 PE=1 SV=2	47.3673	22.8457	9	13	9	499	55.421	5.78	26.4498
High	P07437	Tubulin beta chain OS=Homo sapiens GN=TUBB PE=1 SV=2	46.3984	27.4775	10	16	3	444	49.639	4.89	29.489
High	Q7Z794	Keratin, type II cytoskeletal 1b OS=Homo sapiens GN=KRT77 PE=2 SV=3	45.7907	18.3391	12	26	7	578	61.864	5.99	48.4079
High	P07355	Annexin A2 OS=Homo sapiens GN=ANXA2 PE=1 SV=2	45.7396	35.6932	12	13	12	339	38.58	7.75	20.5459
High	P33176	Kinesin-1 heavy chain OS=Homo sapiens GN=KIF5B PE=1 SV=1	45.294	10.9034	9	11	9	963	109.617	6.51	19.6253
High	Q9BYG3	MKI67 FHA domain-interacting nucleolar phosphoprotein OS=Homo sapiens GN=NIFK PE=1 SV=1	45.1767	27.6451	7	9	7	293	34.201	9.88	16.1614
High	Q13823	Nucleolar GTP-binding protein 2 OS=Homo sapiens GN=GNL2 PE=1 SV=1	44.709	17.5103	12	13	12	731	83.603	9.25	19.3102
High	P0DMV9	Heat shock 70 kDa protein 1B OS=Homo sapiens GN=HSPA1B PE=1 SV=1	44.5223	17.6287	10	12	8	641	70.009	5.66	25.8006
High	P62753	40S ribosomal protein S6 OS=Homo sapiens GN=RPS6 PE=1 SV=1	44.0769	24.498	8	11	8	249	28.663	10.84	31.1697
High	Q9Y2W2	WW domain-binding protein 11 OS=Homo sapiens GN=WBP11 PE=1 SV=1	43.0784	21.9969	11	11	11	641	69.954	8.38	20.9753
High	Q9Y4I1	Unconventional myosin-Va OS=Homo sapiens GN=MYO5A PE=1 SV=2	43.0577	7.27763	12	13	12	1855	215.269	8.48	21.6644
High	O75533	Splicing factor 3B subunit 1 OS=Homo sapiens GN=SF3B1 PE=1 SV=3	43.0416	13.0368	13	13	13	1304	145.738	7.09	21.6223
High	Q9BVS4	Serine/threonine-protein kinase RIO2 OS=Homo sapiens GN=RIOK2 PE=1 SV=2	42.9371	22.2826	10	10	10	552	63.243	5.94	19.5156
High	Q9UG63	ATP-binding cassette sub-family F member 2 OS=Homo sapiens GN=ABCF2 PE=1 SV=2	42.8845	21.9904	12	14	12	623	71.245	7.37	24.2532
High	O43172	U4/U6 small nuclear ribonucleoprotein Prp4 OS=Homo sapiens GN=PRPF4 PE=1 SV=2	42.4493	22.6054	11	11	11	522	58.412	7.42	26.2199
High	P23396	40S ribosomal protein S3 OS=Homo sapiens GN=RPS3 PE=1 SV=2	42.0087	41.9753	9	12	9	243	26.671	9.66	28.3823
High	Q9UHR5	SAP30-binding protein OS=Homo sapiens GN=SAP30BP PE=1 SV=1	40.9276	24.6753	7	8	7	308	33.85	4.84	20.6477
High	Q15393	Splicing factor 3B subunit 3 OS=Homo sapiens GN=SF3B3 PE=1 SV=4	39.2801	12.9827	13	14	13	1217	135.492	5.26	17.2506
High	Q13435	Splicing factor 3B subunit 2 OS=Homo sapiens GN=SF3B2 PE=1 SV=2	39.2716	15.5307	14	14	14	895	100.165	5.67	27.5328
High	P33992	DNA replication licensing factor MCM5 OS=Homo sapiens GN=MCM5 PE=1 SV=5	38.8718	15.6676	11	12	11	734	82.233	8.37	14.7595
High	Q9UJV9	Probable ATP-dependent RNA helicase DDX41 OS=Homo sapiens GN=DDX41 PE=1 SV=2	38.5032	19.7749	11	11	11	622	69.793	6.84	21.7672
High	O00571	ATP-dependent RNA helicase DDX3X OS=Homo sapiens GN=DDX3X PE=1 SV=3	38.3606	15.861	9	11	8	662	73.198	7.18	24.9131
High	O43809	Cleavage and polyadenylation specificity factor subunit 5 OS=Homo sapiens GN=NUDT21 PE=1 SV=1	38.0417	32.5991	7	8	7	227	26.211	8.82	20.499
High	Q8N1N4	Keratin, type II cytoskeletal 78 OS=Homo sapiens GN=KRT78 PE=2 SV=2	36.6044	17.8846	9	9	7	520	56.83	6.02	20.048
High	P10809	60 kDa heat shock protein, mitochondrial OS=Homo sapiens GN=HSPD1 PE=1 SV=2	36.3546	20.0698	9	10	9	573	61.016	5.87	17.9967
High	P05787	Keratin, type II cytoskeletal 8 OS=Homo sapiens GN=KRT8 PE=1 SV=7	35.7509	8.28157	8	17	1	483	53.671	5.59	35.2513
High	Q99459	Cell division cycle 5-like protein OS=Homo sapiens GN=CDC5L PE=1 SV=2	34.9128	15.0873	9	10	9	802	92.194	8.18	19.6313
High	O43709	Probable 18S rRNA (guanine-N(7))-methyltransferase OS=Homo sapiens GN=WBSCR22 PE=1 SV=2	34.836	21.3523	5	8	5	281	31.86	8.73	19.2564
High	P35611	Alpha-adducin OS=Homo sapiens GN=ADD1 PE=1 SV=2	34.4439	12.2117	8	9	8	737	80.905	5.83	17.8872
High	Q9NQZ2	Something about silencing protein 10 OS=Homo sapiens GN=UTP3 PE=1 SV=1	34.3954	16.0752	9	9	9	479	54.525	5.62	24.2371
High	Q9H0A0	RNA cytidine acetyltransferase OS=Homo sapiens GN=NAT10 PE=1 SV=2	34.0687	11.6098	11	12	11	1025	115.657	8.27	13.2643
High	O00160	Unconventional myosin-If OS=Homo sapiens GN=MYO1F PE=1 SV=3	33.3215	10.5647	10	10	8	1098	124.766	9.11	14.3348
High	Q13310	Polyadenylate-binding protein 4 OS=Homo sapiens GN=PABPC4 PE=1 SV=1	33.1643	17.5466	10	12	7	644	70.738	9.26	12.9926
High	P19338	Nucleolin OS=Homo sapiens GN=NCL PE=1 SV=3	32.9101	15.2113	11	11	11	710	76.568	4.7	20.3633
High	Q6UWP8	Suprabasin OS=Homo sapiens GN=SBSN PE=1 SV=2	32.8551	18.3051	3	4	3	590	60.505	7.01	17.4661
High	O00139	Kinesin-like protein KIF2A OS=Homo sapiens GN=KIF2A PE=1 SV=3	32.8156	16.289	11	11	10	706	79.905	6.68	19.8105
High	E9PAV3	Nascent polypeptide-associated complex subunit alpha, muscle-specific form OS=Homo sapiens GN=NACA PE=1 SV=1	32.3951	3.36862	5	8	5	2078	205.295	9.58	19.3932
High	P06702	Protein S100-A9 OS=Homo sapiens GN=S100A9 PE=1 SV=1	31.8935	38.5965	4	7	4	114	13.234	6.13	15.9864
High	P48047	ATP synthase subunit O, mitochondrial OS=Homo sapiens GN=ATP5O PE=1 SV=1	30.3721	43.662	8	9	8	213	23.263	9.96	19.5433
High	Q53GS9	U4/U6.U5 tri-snRNP-associated protein 2 OS=Homo sapiens GN=USP39 PE=1 SV=2	30.1577	16.1062	8	10	8	565	65.34	8.91	15.7419
High	P67809	Nuclease-sensitive element-binding protein 1 OS=Homo sapiens GN=YBX1 PE=1 SV=3	29.8556	28.0864	5	5	5	324	35.903	9.88	14.182
High	P55209	Nucleosome assembly protein 1-like 1 OS=Homo sapiens GN=NAP1L1 PE=1 SV=1	29.8415	14.578	5	8	5	391	45.346	4.46	11.5176
High	P06576	ATP synthase subunit beta, mitochondrial OS=Homo sapiens GN=ATP5B PE=1 SV=3	29.7818	15.3119	6	7	6	529	56.525	5.4	14.142
High	P21127	Cyclin-dependent kinase 11B OS=Homo sapiens GN=CDK11B PE=1 SV=3	29.5764	14.9686	13	15	13	795	92.65	5.57	12.2015
High	P19013	Keratin, type II cytoskeletal 4 OS=Homo sapiens GN=KRT4 PE=1 SV=4	29.4034	16.6667	9	15	6	534	57.25	6.61	20.413
High	P27694	Replication protein A 70 kDa DNA-binding subunit OS=Homo sapiens GN=RPA1 PE=1 SV=2	28.9281	15.0974	8	8	8	616	68.095	7.21	15.3639
High	Q8IY81	pre-rRNA processing protein FTSJ3 OS=Homo sapiens GN=FTSJ3 PE=1 SV=2	28.9204	8.97285	6	6	6	847	96.499	8.4	15.5098
High	P14923	Junction plakoglobin OS=Homo sapiens GN=JUP PE=1 SV=3	28.8992	13.557	9	10	9	745	81.693	6.14	16.2791
High	P11940	Polyadenylate-binding protein 1 OS=Homo sapiens GN=PABPC1 PE=1 SV=2	28.8722	15.2516	9	11	6	636	70.626	9.5	15.1448
High	O94992	Protein HEXIM1 OS=Homo sapiens GN=HEXIM1 PE=1 SV=1	28.3067	18.663	4	6	4	359	40.598	4.89	12.3782
High	P25311	Zinc-alpha-2-glycoprotein OS=Homo sapiens GN=AZGP1 PE=1 SV=2	27.9707	28.1879	8	8	8	298	34.237	6.05	12.3517
High	Q5SW79	Centrosomal protein of 170 kDa OS=Homo sapiens GN=CEP170 PE=1 SV=1	27.8564	6.18687	8	8	8	1584	175.187	7.11	14.6155
High	Q9NVI7	ATPase family AAA domain-containing protein 3A OS=Homo sapiens GN=ATAD3A PE=1 SV=2	27.8415	13.8801	9	10	3	634	71.325	8.98	15.3736
High	P13646	Keratin, type I cytoskeletal 13 OS=Homo sapiens GN=KRT13 PE=1 SV=4	27.8097	13.9738	8	16	2	458	49.557	4.96	33.7173
High	Q92841	Probable ATP-dependent RNA helicase DDX17 OS=Homo sapiens GN=DDX17 PE=1 SV=2	27.7663	9.32785	6	8	2	729	80.222	8.27	12.6348
High	Q9ULX3	RNA-binding protein NOB1 OS=Homo sapiens GN=NOB1 PE=1 SV=1	27.7018	15.2913	5	6	5	412	46.646	7.18	16.3042
High	P68104	Elongation factor 1-alpha 1 OS=Homo sapiens GN=EEF1A1 PE=1 SV=1	27.17	20.3463	8	10	8	462	50.109	9.01	19.6933
High	P27348	14-3-3 protein theta OS=Homo sapiens GN=YWHAQ PE=1 SV=1	26.9046	28.5714	6	9	3	245	27.747	4.78	12.7941
High	P06733	Alpha-enolase OS=Homo sapiens GN=ENO1 PE=1 SV=2	26.5891	21.659	8	8	8	434	47.139	7.39	7.49043
High	Q4KMP7	TBC1 domain family member 10B OS=Homo sapiens GN=TBC1D10B PE=1 SV=3	26.4616	6.93069	4	6	4	808	87.145	9.19	11.8879
High	P63010	AP-2 complex subunit beta OS=Homo sapiens GN=AP2B1 PE=1 SV=1	26.1991	12.4867	11	11	11	937	104.486	5.38	11.9658
High	Q5T9A4	ATPase family AAA domain-containing protein 3B OS=Homo sapiens GN=ATAD3B PE=1 SV=1	26.1856	11.1111	7	8	1	648	72.527	9.2	14.6228
High	Q6UN15	Pre-mRNA 3'-end-processing factor FIP1 OS=Homo sapiens GN=FIP1L1 PE=1 SV=1	25.9013	10.7744	5	7	5	594	66.487	5.59	13.3167
High	P35241	Radixin OS=Homo sapiens GN=RDX PE=1 SV=1	25.5893	7.37564	6	8	1	583	68.521	6.37	14.4197
High	P25705	ATP synthase subunit alpha, mitochondrial OS=Homo sapiens GN=ATP5A1 PE=1 SV=1	24.9876	15.009	7	7	7	553	59.714	9.13	14.6688
High	O95248	Myotubularin-related protein 5 OS=Homo sapiens GN=SBF1 PE=1 SV=3	24.961	3.80289	7	8	7	1867	208.184	6.9	11.1144
High	Q8IUF8	Bifunctional lysine-specific demethylase and histidyl-hydroxylase MINA OS=Homo sapiens GN=MINA PE=1 SV=1	24.8788	19.7849	8	9	8	465	52.767	6.7	9.73495
High	Q49A26	Putative oxidoreductase GLYR1 OS=Homo sapiens GN=GLYR1 PE=1 SV=3	24.8287	13.3816	7	8	7	553	60.518	9.17	14.8262
High	P27635	60S ribosomal protein L10 OS=Homo sapiens GN=RPL10 PE=1 SV=4	24.5746	31.3084	7	10	7	214	24.588	10.08	19.4425
High	Q7KZI7	Serine/threonine-protein kinase MARK2 OS=Homo sapiens GN=MARK2 PE=1 SV=2	24.5615	9.89848	5	5	5	788	87.856	9.72	12.2488
High	P47756	F-actin-capping protein subunit beta OS=Homo sapiens GN=CAPZB PE=1 SV=4	24.4076	18.7726	5	6	5	277	31.331	5.59	6.99502
High	Q12965	Unconventional myosin-Ie OS=Homo sapiens GN=MYO1E PE=1 SV=2	24.3625	8.93502	9	9	7	1108	126.982	8.92	9.00358
High	P14649	Myosin light chain 6B OS=Homo sapiens GN=MYL6B PE=1 SV=1	24.0461	37.5	8	9	6	208	22.75	5.73	13.823
High	Q01082	Spectrin beta chain, non-erythrocytic 1 OS=Homo sapiens GN=SPTBN1 PE=1 SV=2	23.9775	4.18782	9	9	9	2364	274.439	5.57	12.2524
High	P26368	Splicing factor U2AF 65 kDa subunit OS=Homo sapiens GN=U2AF2 PE=1 SV=4	23.6853	13.4737	5	6	5	475	53.467	9.09	10.2403
High	O94804	Serine/threonine-protein kinase 10 OS=Homo sapiens GN=STK10 PE=1 SV=1	23.569	6.71488	7	7	7	968	112.065	6.95	9.95719
High	P31151	Protein S100-A7 OS=Homo sapiens GN=S100A7 PE=1 SV=4	23.4712	34.6535	4	6	4	101	11.464	6.77	11.1987
High	Q16630	Cleavage and polyadenylation specificity factor subunit 6 OS=Homo sapiens GN=CPSF6 PE=1 SV=2	23.4621	14.3376	6	7	6	551	59.173	7.15	8.75563
High	P31944	Caspase-14 OS=Homo sapiens GN=CASP14 PE=1 SV=2	22.9865	14.876	5	5	5	242	27.662	5.58	12.4934
High	P56182	Ribosomal RNA processing protein 1 homolog A OS=Homo sapiens GN=RRP1 PE=1 SV=1	22.7697	16.9197	7	8	7	461	52.807	9.33	8.45926
High	P62241	40S ribosomal protein S8 OS=Homo sapiens GN=RPS8 PE=1 SV=2	22.755	34.1346	6	7	6	208	24.19	10.32	11.0276
High	P01876	Ig alpha-1 chain C region OS=Homo sapiens GN=IGHA1 PE=1 SV=2	22.7266	20.9632	7	7	7	353	37.631	6.51	12.5141
High	Q8WXX5	DnaJ homolog subfamily C member 9 OS=Homo sapiens GN=DNAJC9 PE=1 SV=1	22.512	26.5385	6	6	6	260	29.891	5.73	11.8235
High	P14618	Pyruvate kinase PKM OS=Homo sapiens GN=PKM PE=1 SV=4	22.433	14.6893	6	6	6	531	57.9	7.84	11.5732
High	P16402	Histone H1.3 OS=Homo sapiens GN=HIST1H1D PE=1 SV=2	22.3793	15.3846	5	7	5	221	22.336	11.02	17.2336
High	Q08554	Desmocollin-1 OS=Homo sapiens GN=DSC1 PE=1 SV=2	22.3348	6.59955	5	6	5	894	99.924	5.43	12.4013
High	Q9HAU5	Regulator of nonsense transcripts 2 OS=Homo sapiens GN=UPF2 PE=1 SV=1	22.2128	7.7044	10	10	10	1272	147.717	5.69	6.30802
High	Q9UNQ2	Probable dimethyladenosine transferase OS=Homo sapiens GN=DIMT1 PE=1 SV=1	22.0878	24.2812	6	7	6	313	35.214	9.99	13.761
High	Q92608	Dedicator of cytokinesis protein 2 OS=Homo sapiens GN=DOCK2 PE=1 SV=2	21.9457	4.15301	8	8	8	1830	211.812	6.87	9.83292
High	P78347	General transcription factor II-I OS=Homo sapiens GN=GTF2I PE=1 SV=2	21.8506	6.01202	6	8	6	998	112.346	6.39	16.5323
High	P08865	40S ribosomal protein SA OS=Homo sapiens GN=RPSA PE=1 SV=4	21.7676	22.3729	6	6	6	295	32.833	4.87	9.15063
High	P01834	Ig kappa chain C region OS=Homo sapiens GN=IGKC PE=1 SV=1	21.7457	51.8868	3	4	3	106	11.602	5.87	12.0488
High	P49411	Elongation factor Tu, mitochondrial OS=Homo sapiens GN=TUFM PE=1 SV=2	21.3752	17.2566	7	8	7	452	49.51	7.61	9.46991
High	Q5UIP0	Telomere-associated protein RIF1 OS=Homo sapiens GN=RIF1 PE=1 SV=2	21.3421	2.71036	5	5	5	2472	274.294	5.52	9.06852
High	P24539	ATP synthase F(0) complex subunit B1, mitochondrial OS=Homo sapiens GN=ATP5F1 PE=1 SV=2	21.2535	16.4062	4	5	4	256	28.89	9.36	8.03812
High	Q9UBB9	Tuftelin-interacting protein 11 OS=Homo sapiens GN=TFIP11 PE=1 SV=1	20.9416	7.76583	6	6	6	837	96.758	5.67	9.69461
High	P43366	Melanoma-associated antigen B1 OS=Homo sapiens GN=MAGEB1 PE=1 SV=2	20.8062	21.0375	6	6	6	347	39.013	8.44	10.5943
High	Q3KQU3	MAP7 domain-containing protein 1 OS=Homo sapiens GN=MAP7D1 PE=1 SV=1	20.6425	11.7717	9	9	9	841	92.764	10.11	13.0735
High	P60660	Myosin light polypeptide 6 OS=Homo sapiens GN=MYL6 PE=1 SV=2	20.6288	31.1258	5	6	3	151	16.919	4.65	11.5201
High	Q9UEY8	Gamma-adducin OS=Homo sapiens GN=ADD3 PE=1 SV=1	20.352	12.1813	7	8	7	706	79.105	6.32	12.7535
High	Q9H0G5	Nuclear speckle splicing regulatory protein 1 OS=Homo sapiens GN=NSRP1 PE=1 SV=1	20.1134	10.0358	5	5	5	558	66.35	8.84	8.95599
High	P52907	F-actin-capping protein subunit alpha-1 OS=Homo sapiens GN=CAPZA1 PE=1 SV=3	20.0482	21.6783	4	5	3	286	32.902	5.69	10.9811
High	Q92922	SWI/SNF complex subunit SMARCC1 OS=Homo sapiens GN=SMARCC1 PE=1 SV=3	19.7708	6.51584	6	6	4	1105	122.79	5.76	7.18644
High	P49756	RNA-binding protein 25 OS=Homo sapiens GN=RBM25 PE=1 SV=3	19.739	7.23606	4	4	4	843	100.124	6.32	10.493
High	P61981	14-3-3 protein gamma OS=Homo sapiens GN=YWHAG PE=1 SV=2	19.6824	20.2429	5	8	2	247	28.285	4.89	10.8772
High	Q96JP5	E3 ubiquitin-protein ligase ZFP91 OS=Homo sapiens GN=ZFP91 PE=1 SV=1	19.5679	8.24561	3	3	3	570	63.406	7.36	8.90742
High	O00159	Unconventional myosin-Ic OS=Homo sapiens GN=MYO1C PE=1 SV=4	19.4028	8.74882	7	7	7	1063	121.606	9.41	6.90116
High	Q9BZI7	Regulator of nonsense transcripts 3B OS=Homo sapiens GN=UPF3B PE=1 SV=1	18.9162	9.73085	5	5	5	483	57.727	9.48	8.69097
High	Q9Y5B6	PAX3- and PAX7-binding protein 1 OS=Homo sapiens GN=PAXBP1 PE=1 SV=2	18.8873	8.61505	7	7	7	917	104.739	5.68	5.65786
High	Q08188	Protein-glutamine gamma-glutamyltransferase E OS=Homo sapiens GN=TGM3 PE=1 SV=4	18.8749	5.33911	4	5	4	693	76.584	5.86	9.56238
High	Q92619	Minor histocompatibility protein HA-1 OS=Homo sapiens GN=HMHA1 PE=1 SV=2	18.8593	8.27465	7	7	7	1136	124.536	6.1	11.239
High	Q9BXS6	Nucleolar and spindle-associated protein 1 OS=Homo sapiens GN=NUSAP1 PE=1 SV=1	18.5634	17.0068	6	6	6	441	49.422	9.91	6.69914
High	P14678	Small nuclear ribonucleoprotein-associated proteins B and B' OS=Homo sapiens GN=SNRPB PE=1 SV=2	18.5547	18.75	4	7	4	240	24.594	11.19	10.8622
High	O95782	AP-2 complex subunit alpha-1 OS=Homo sapiens GN=AP2A1 PE=1 SV=3	18.5107	8.80246	8	8	8	977	107.478	7.03	5.70791
High	P06748	Nucleophosmin OS=Homo sapiens GN=NPM1 PE=1 SV=2	18.4734	21.4286	6	6	6	294	32.555	4.78	6.23291
High	Q15323	Keratin, type I cuticular Ha1 OS=Homo sapiens GN=KRT31 PE=1 SV=3	18.3793	6.49038	2	7	1	416	47.207	4.88	13.6143
High	Q5D862	Filaggrin-2 OS=Homo sapiens GN=FLG2 PE=1 SV=1	18.2868	2.96947	4	4	4	2391	247.928	8.31	9.00903
High	P62805	Histone H4 OS=Homo sapiens GN=HIST1H4A PE=1 SV=2	18.2022	40.7767	4	6	4	103	11.36	11.36	12.305
High	Q9UBU9	Nuclear RNA export factor 1 OS=Homo sapiens GN=NXF1 PE=1 SV=1	18.1548	12.601	7	8	7	619	70.139	8.51	7.91165
High	Q9H0B6	Kinesin light chain 2 OS=Homo sapiens GN=KLC2 PE=1 SV=1	17.849	10.9325	6	6	6	622	68.892	7.15	10.3255
High	P36542	ATP synthase subunit gamma, mitochondrial OS=Homo sapiens GN=ATP5C1 PE=1 SV=1	17.5176	19.4631	6	7	6	298	32.975	9.22	12.9318
High	P61978	Heterogeneous nuclear ribonucleoprotein K OS=Homo sapiens GN=HNRNPK PE=1 SV=1	17.4286	10.3672	4	5	4	463	50.944	5.54	11.4723
High	P40222	Alpha-taxilin OS=Homo sapiens GN=TXLNA PE=1 SV=3	17.3451	11.1722	5	5	5	546	61.853	6.52	9.65985
High	Q14498	RNA-binding protein 39 OS=Homo sapiens GN=RBM39 PE=1 SV=2	17.3267	11.8868	5	5	5	530	59.343	10.1	9.95969
High	P63104	14-3-3 protein zeta/delta OS=Homo sapiens GN=YWHAZ PE=1 SV=1	17.288	24.4898	5	7	3	245	27.728	4.79	9.83384
High	Q9NSI2	Protein FAM207A OS=Homo sapiens GN=FAM207A PE=1 SV=2	17.2066	21.7391	4	4	4	230	25.441	11.08	9.17384
High	P31947	14-3-3 protein sigma OS=Homo sapiens GN=SFN PE=1 SV=1	16.9483	16.129	4	7	1	248	27.757	4.74	8.6535
High	Q5JTH9	RRP12-like protein OS=Homo sapiens GN=RRP12 PE=1 SV=2	16.809	6.32228	7	7	7	1297	143.611	8.75	4.64077
High	P05141	ADP/ATP translocase 2 OS=Homo sapiens GN=SLC25A5 PE=1 SV=7	16.6714	19.1275	6	6	6	298	32.831	9.69	1.66115
High	Q86UE4	Protein LYRIC OS=Homo sapiens GN=MTDH PE=1 SV=2	16.6503	9.27835	4	4	4	582	63.799	9.32	8.36534
High	P19474	E3 ubiquitin-protein ligase TRIM21 OS=Homo sapiens GN=TRIM21 PE=1 SV=1	16.5615	14.3158	6	6	6	475	54.135	6.38	10.2645
High	Q9UM54	Unconventional myosin-VI OS=Homo sapiens GN=MYO6 PE=1 SV=4	16.4757	4.40495	5	5	5	1294	149.596	8.53	6.34665
High	O75330	Hyaluronan mediated motility receptor OS=Homo sapiens GN=HMMR PE=1 SV=2	16.4589	6.90608	4	4	4	724	84.049	5.83	5.24264
High	Q6KB66	Keratin, type II cytoskeletal 80 OS=Homo sapiens GN=KRT80 PE=1 SV=2	16.3636	12.3894	5	5	5	452	50.494	5.67	4.89651
High	Q96TA2	ATP-dependent zinc metalloprotease YME1L1 OS=Homo sapiens GN=YME1L1 PE=1 SV=2	16.2589	8.15006	6	6	6	773	86.401	8.76	7.32338
High	Q08J23	tRNA (cytosine(34)-C(5))-methyltransferase OS=Homo sapiens GN=NSUN2 PE=1 SV=2	16.1897	7.56193	4	4	4	767	86.416	6.77	4.50354
High	P04406	Glyceraldehyde-3-phosphate dehydrogenase OS=Homo sapiens GN=GAPDH PE=1 SV=3	15.7844	24.1791	5	6	5	335	36.03	8.46	6.44004
High	P23246	Splicing factor, proline- and glutamine-rich OS=Homo sapiens GN=SFPQ PE=1 SV=2	15.4368	9.33522	6	6	6	707	76.102	9.44	11.4565
High	Q9UJK0	Ribosome biogenesis protein TSR3 homolog OS=Homo sapiens GN=TSR3 PE=1 SV=1	15.3743	16.6667	4	4	4	312	33.575	6.87	6.24609
High	O75044	SLIT-ROBO Rho GTPase-activating protein 2 OS=Homo sapiens GN=SRGAP2 PE=1 SV=2	15.1414	4.29505	4	4	4	1071	120.805	6.7	7.10125
High	P26373	60S ribosomal protein L13 OS=Homo sapiens GN=RPL13 PE=1 SV=4	14.9874	22.7488	5	6	5	211	24.247	11.65	10.4979
High	Q00839	Heterogeneous nuclear ribonucleoprotein U OS=Homo sapiens GN=HNRNPU PE=1 SV=6	14.8973	6.06061	4	4	4	825	90.528	6	5.48763
High	Q7Z7K6	Centromere protein V OS=Homo sapiens GN=CENPV PE=1 SV=1	14.7543	9.81818	2	3	2	275	29.927	9.73	5.64875
High	O95232	Luc7-like protein 3 OS=Homo sapiens GN=LUC7L3 PE=1 SV=2	14.746	9.49074	3	3	3	432	51.435	9.79	7.37578
High	P36578	60S ribosomal protein L4 OS=Homo sapiens GN=RPL4 PE=1 SV=5	14.6209	15.9251	5	5	5	427	47.667	11.06	8.72108
High	P62258	14-3-3 protein epsilon OS=Homo sapiens GN=YWHAE PE=1 SV=1	14.6102	15.6863	4	6	2	255	29.155	4.74	10.5514
High	Q9BSC4	Nucleolar protein 10 OS=Homo sapiens GN=NOL10 PE=1 SV=1	14.5469	6.10465	4	5	4	688	80.251	8.46	4.16017
High	P05109	Protein S100-A8 OS=Homo sapiens GN=S100A8 PE=1 SV=1	14.5215	32.2581	3	5	3	93	10.828	7.03	9.41867
High	P04792	Heat shock protein beta-1 OS=Homo sapiens GN=HSPB1 PE=1 SV=2	14.3133	26.3415	4	5	4	205	22.768	6.4	6.84966
High	Q7L014	Probable ATP-dependent RNA helicase DDX46 OS=Homo sapiens GN=DDX46 PE=1 SV=2	14.2984	5.23763	5	5	5	1031	117.29	9.29	6.65069
High	P31946	14-3-3 protein beta/alpha OS=Homo sapiens GN=YWHAB PE=1 SV=3	14.2963	16.2602	4	7	1	246	28.065	4.83	5.4707
High	Q96I25	Splicing factor 45 OS=Homo sapiens GN=RBM17 PE=1 SV=1	14.2558	12.4688	4	5	3	401	44.934	5.97	6.93881
High	P05198	Eukaryotic translation initiation factor 2 subunit 1 OS=Homo sapiens GN=EIF2S1 PE=1 SV=3	14.216	19.6825	6	6	6	315	36.089	5.08	3.82139
High	Q9H4L5	Oxysterol-binding protein-related protein 3 OS=Homo sapiens GN=OSBPL3 PE=1 SV=1	14.1068	4.50958	3	3	3	887	101.16	6.87	4.59277
High	P02765	Alpha-2-HS-glycoprotein OS=Homo sapiens GN=AHSG PE=1 SV=1	14.044	5.44959	2	3	2	367	39.3	5.72	7.71574
High	Q96P63	Serpin B12 OS=Homo sapiens GN=SERPINB12 PE=1 SV=1	13.7752	10.6173	4	4	4	405	46.247	5.53	9.96451
High	Q8NDX1	PH and SEC7 domain-containing protein 4 OS=Homo sapiens GN=PSD4 PE=1 SV=2	13.641	5.49242	4	5	4	1056	116.177	5.48	4.46853
High	Q8TAQ2	SWI/SNF complex subunit SMARCC2 OS=Homo sapiens GN=SMARCC2 PE=1 SV=1	13.5027	2.9654	3	3	1	1214	132.797	5.69	3.60305
High	Q9UI10	Translation initiation factor eIF-2B subunit delta OS=Homo sapiens GN=EIF2B4 PE=1 SV=2	13.5024	11.6635	5	5	5	523	57.521	9.38	7.68582
High	P07195	L-lactate dehydrogenase B chain OS=Homo sapiens GN=LDHB PE=1 SV=2	13.4988	14.0719	4	4	4	334	36.615	6.05	4.0534
High	Q13895	Bystin OS=Homo sapiens GN=BYSL PE=1 SV=3	13.4514	11.2128	4	4	4	437	49.57	8.12	7.75055
High	P05388	60S acidic ribosomal protein P0 OS=Homo sapiens GN=RPLP0 PE=1 SV=1	13.3146	16.4038	3	3	3	317	34.252	5.97	7.5237
High	O43795	Unconventional myosin-Ib OS=Homo sapiens GN=MYO1B PE=1 SV=3	13.3015	5.01761	5	5	5	1136	131.902	9.38	3.59885
High	Q8NC51	Plasminogen activator inhibitor 1 RNA-binding protein OS=Homo sapiens GN=SERBP1 PE=1 SV=2	13.2609	8.82353	4	5	4	408	44.938	8.65	8.47407
High	Q9NZM5	Glioma tumor suppressor candidate region gene 2 protein OS=Homo sapiens GN=GLTSCR2 PE=1 SV=2	13.2218	10.251	4	4	4	478	54.356	10.32	8.41904
High	P29508	Serpin B3 OS=Homo sapiens GN=SERPINB3 PE=1 SV=2	13.1014	10.5128	4	4	4	390	44.537	6.81	5.60304
High	Q9Y4F1	FERM, RhoGEF and pleckstrin domain-containing protein 1 OS=Homo sapiens GN=FARP1 PE=1 SV=1	12.9728	4.01914	3	3	3	1045	118.559	8.15	7.24515
High	Q9NQ29	Putative RNA-binding protein Luc7-like 1 OS=Homo sapiens GN=LUC7L PE=1 SV=1	12.7434	12.3989	4	4	2	371	43.701	9.92	6.52755
High	Q9Y608	Leucine-rich repeat flightless-interacting protein 2 OS=Homo sapiens GN=LRRFIP2 PE=1 SV=1	12.7131	5.82524	3	3	3	721	82.121	6.95	7.0031
High	Q9H089	Large subunit GTPase 1 homolog OS=Homo sapiens GN=LSG1 PE=1 SV=2	12.6075	7.14286	4	4	4	658	75.178	6.38	6.23908
High	Q12874	Splicing factor 3A subunit 3 OS=Homo sapiens GN=SF3A3 PE=1 SV=1	12.58	7.78443	4	4	4	501	58.812	5.38	5.6548
High	Q15014	Mortality factor 4-like protein 2 OS=Homo sapiens GN=MORF4L2 PE=1 SV=1	12.4645	18.4028	5	5	4	288	32.288	9.72	8.25612
High	P07305	Histone H1.0 OS=Homo sapiens GN=H1F0 PE=1 SV=3	12.4116	16.4948	3	4	3	194	20.85	10.84	8.97166
High	Q14974	Importin subunit beta-1 OS=Homo sapiens GN=KPNB1 PE=1 SV=2	12.3813	4.10959	3	3	3	876	97.108	4.78	5.19156
High	P60174	Triosephosphate isomerase OS=Homo sapiens GN=TPI1 PE=1 SV=3	12.3561	12.2378	3	4	3	286	30.772	5.92	4.17158
High	P62906	60S ribosomal protein L10a OS=Homo sapiens GN=RPL10A PE=1 SV=2	12.334	19.8157	4	5	4	217	24.816	9.94	6.82165
High	P41091	Eukaryotic translation initiation factor 2 subunit 3 OS=Homo sapiens GN=EIF2S3 PE=1 SV=3	12.0832	5.08475	2	3	2	472	51.077	8.4	9.24126
High	O75909	Cyclin-K OS=Homo sapiens GN=CCNK PE=1 SV=2	11.8005	7.41379	3	5	3	580	64.199	8.41	4.91261
High	O96019	Actin-like protein 6A OS=Homo sapiens GN=ACTL6A PE=1 SV=1	11.762	10.7226	4	4	4	429	47.43	5.6	6.36212
High	Q96AG4	Leucine-rich repeat-containing protein 59 OS=Homo sapiens GN=LRRC59 PE=1 SV=1	11.7367	14.658	4	4	4	307	34.909	9.57	8.58335
High	P01857	Ig gamma-1 chain C region OS=Homo sapiens GN=IGHG1 PE=1 SV=1	11.6838	14.5455	4	4	2	330	36.083	8.19	6.27571
High	Q9P258	Protein RCC2 OS=Homo sapiens GN=RCC2 PE=1 SV=2	11.582	6.89655	3	4	3	522	56.049	8.78	8.47359
High	Q9UN86	Ras GTPase-activating protein-binding protein 2 OS=Homo sapiens GN=G3BP2 PE=1 SV=2	11.3576	6.639	3	3	3	482	54.088	5.55	6.42223
High	Q15233	Non-POU domain-containing octamer-binding protein OS=Homo sapiens GN=NONO PE=1 SV=4	11.3525	14.0127	5	6	5	471	54.197	8.95	0
High	Q8NFW8	N-acylneuraminate cytidylyltransferase OS=Homo sapiens GN=CMAS PE=1 SV=2	11.3417	7.8341	4	4	4	434	48.349	7.93	6.72002
High	Q8TDD1	ATP-dependent RNA helicase DDX54 OS=Homo sapiens GN=DDX54 PE=1 SV=2	11.0261	3.29171	3	3	3	881	98.534	10.02	5.02674
High	O43491	Band 4.1-like protein 2 OS=Homo sapiens GN=EPB41L2 PE=1 SV=1	11.0245	3.48259	3	3	3	1005	112.519	5.44	4.62171
High	Q02878	60S ribosomal protein L6 OS=Homo sapiens GN=RPL6 PE=1 SV=3	11.0109	14.5833	4	4	4	288	32.708	10.58	5.67003
High	O14744	Protein arginine N-methyltransferase 5 OS=Homo sapiens GN=PRMT5 PE=1 SV=4	10.9979	6.12245	3	3	3	637	72.638	6.29	2.21293
High	Q9H6W3	Bifunctional lysine-specific demethylase and histidyl-hydroxylase NO66 OS=Homo sapiens GN=NO66 PE=1 SV=2	10.9616	9.82839	4	4	4	641	71.041	6.46	7.25776
High	P08670	Vimentin OS=Homo sapiens GN=VIM PE=1 SV=4	10.7774	8.58369	4	4	4	466	53.619	5.12	5.81638
High	Q9NUL7	Probable ATP-dependent RNA helicase DDX28 OS=Homo sapiens GN=DDX28 PE=1 SV=2	10.7392	7.77778	4	5	4	540	59.545	10.42	10.9648
High	Q9Y613	FH1/FH2 domain-containing protein 1 OS=Homo sapiens GN=FHOD1 PE=1 SV=3	10.7306	6.09966	6	6	6	1164	126.473	6.39	6.47422
High	Q92759	General transcription factor IIH subunit 4 OS=Homo sapiens GN=GTF2H4 PE=2 SV=1	10.6309	8.22511	3	4	3	462	52.153	9.04	4.66774
High	P62826	GTP-binding nuclear protein Ran OS=Homo sapiens GN=RAN PE=1 SV=3	10.6144	16.6667	4	5	4	216	24.408	7.49	8.55257
High	Q9Y3I0	tRNA-splicing ligase RtcB homolog OS=Homo sapiens GN=RTCB PE=1 SV=1	10.5789	8.11881	4	4	4	505	55.175	7.23	6.09691
High	Q9UMS4	Pre-mRNA-processing factor 19 OS=Homo sapiens GN=PRPF19 PE=1 SV=1	10.5776	4.36508	2	3	2	504	55.146	6.61	4.13434
High	P62424	60S ribosomal protein L7a OS=Homo sapiens GN=RPL7A PE=1 SV=2	10.5705	20.6767	5	5	5	266	29.977	10.61	2.79008
High	P51532	Transcription activator BRG1 OS=Homo sapiens GN=SMARCA4 PE=1 SV=2	10.5467	2.00364	3	3	3	1647	184.53	7.88	2.25931
High	O43143	Pre-mRNA-splicing factor ATP-dependent RNA helicase DHX15 OS=Homo sapiens GN=DHX15 PE=1 SV=2	10.4572	4.65409	3	3	3	795	90.875	7.46	2.29959
High	Q06830	Peroxiredoxin-1 OS=Homo sapiens GN=PRDX1 PE=1 SV=1	10.4187	27.1357	5	6	5	199	22.096	8.13	6.41804
High	Q9NVF7	F-box only protein 28 OS=Homo sapiens GN=FBXO28 PE=1 SV=1	10.4103	6.52174	2	2	2	368	41.123	9.55	5.00305
High	Q96GA3	Protein LTV1 homolog OS=Homo sapiens GN=LTV1 PE=1 SV=1	10.3961	6.73684	3	3	3	475	54.821	4.91	6.84582
High	P30419	Glycylpeptide N-tetradecanoyltransferase 1 OS=Homo sapiens GN=NMT1 PE=1 SV=2	10.3838	6.85484	3	3	3	496	56.77	7.8	7.27238
High	Q9BZE4	Nucleolar GTP-binding protein 1 OS=Homo sapiens GN=GTPBP4 PE=1 SV=3	10.0288	4.25868	3	3	3	634	73.918	9.5	6.63051
High	Q9H4E7	Differentially expressed in FDCP 6 homolog OS=Homo sapiens GN=DEF6 PE=1 SV=1	9.96174	4.91284	3	3	3	631	73.864	6.05	4.70551
High	Q15084	Protein disulfide-isomerase A6 OS=Homo sapiens GN=PDIA6 PE=1 SV=1	9.94747	8.86364	3	3	3	440	48.091	5.08	4.42658
High	Q9Y224	UPF0568 protein C14orf166 OS=Homo sapiens GN=C14orf166 PE=1 SV=1	9.85142	15.9836	4	4	4	244	28.051	6.65	5.65617
High	P62979	Ubiquitin-40S ribosomal protein S27a OS=Homo sapiens GN=RPS27A PE=1 SV=2	9.78629	24.359	3	3	3	156	17.953	9.64	4.26686
High	Q5T8P6	RNA-binding protein 26 OS=Homo sapiens GN=RBM26 PE=1 SV=3	9.76977	3.67428	4	4	4	1007	113.527	9.16	4.22119
High	P68871	Hemoglobin subunit beta OS=Homo sapiens GN=HBB PE=1 SV=2	9.67466	21.0884	3	4	3	147	15.988	7.28	4.16758
High	Q96R06	Sperm-associated antigen 5 OS=Homo sapiens GN=SPAG5 PE=1 SV=2	9.447	3.43671	3	3	3	1193	134.338	5	0
High	P61221	ATP-binding cassette sub-family E member 1 OS=Homo sapiens GN=ABCE1 PE=1 SV=1	9.4347	5.84307	3	3	3	599	67.271	8.34	4.13589
High	Q9UH62	Armadillo repeat-containing X-linked protein 3 OS=Homo sapiens GN=ARMCX3 PE=1 SV=1	9.2989	9.49868	3	3	3	379	42.474	8.37	5.37568
High	O00541	Pescadillo homolog OS=Homo sapiens GN=PES1 PE=1 SV=1	9.24011	5.95238	4	4	4	588	67.96	7.33	7.06949
High	P84098	60S ribosomal protein L19 OS=Homo sapiens GN=RPL19 PE=1 SV=1	9.23709	7.14286	2	4	2	196	23.451	11.47	6.49752
High	P09661	U2 small nuclear ribonucleoprotein A' OS=Homo sapiens GN=SNRPA1 PE=1 SV=2	9.18115	9.80392	2	2	2	255	28.398	8.62	5.08144
High	Q68CQ4	Digestive organ expansion factor homolog OS=Homo sapiens GN=DIEXF PE=1 SV=2	9.07671	4.2328	3	3	3	756	87.001	5.88	6.4355
High	P46777	60S ribosomal protein L5 OS=Homo sapiens GN=RPL5 PE=1 SV=3	8.99854	8.75421	2	2	2	297	34.341	9.72	2.53011
High	Q8NEJ9	Neuroguidin OS=Homo sapiens GN=NGDN PE=1 SV=1	8.97796	8.88889	2	2	2	315	35.872	9.57	4.99758
High	Q8IWC1	MAP7 domain-containing protein 3 OS=Homo sapiens GN=MAP7D3 PE=1 SV=2	8.95937	5.47945	4	4	4	876	98.368	9.32	4.40571
High	Q13724	Mannosyl-oligosaccharide glucosidase OS=Homo sapiens GN=MOGS PE=1 SV=5	8.9285	6.81004	5	5	5	837	91.861	8.9	3.52893
High	Q96AQ6	Pre-B-cell leukemia transcription factor-interacting protein 1 OS=Homo sapiens GN=PBXIP1 PE=1 SV=1	8.88013	4.78796	3	3	3	731	80.594	5.33	5.64903
High	P39023	60S ribosomal protein L3 OS=Homo sapiens GN=RPL3 PE=1 SV=2	8.8349	8.68486	4	4	4	403	46.08	10.18	4.63709
High	Q14739	Lamin-B receptor OS=Homo sapiens GN=LBR PE=1 SV=2	8.81799	4.71545	3	4	3	615	70.658	9.36	5.72187
High	P46781	40S ribosomal protein S9 OS=Homo sapiens GN=RPS9 PE=1 SV=3	8.81656	15.4639	4	4	4	194	22.578	10.65	3.43115
High	Q12824	SWI/SNF-related matrix-associated actin-dependent regulator of chromatin subfamily B member 1 OS=Homo sapiens GN=SMARCB1 PE=1 SV=2	8.8118	11.9481	4	4	4	385	44.113	6.23	1.85654
High	P20042	Eukaryotic translation initiation factor 2 subunit 2 OS=Homo sapiens GN=EIF2S2 PE=1 SV=2	8.73052	7.50751	2	2	2	333	38.364	5.8	2.34801
High	P15880	40S ribosomal protein S2 OS=Homo sapiens GN=RPS2 PE=1 SV=2	8.65737	15.3584	4	4	4	293	31.305	10.24	0
High	Q96DI7	U5 small nuclear ribonucleoprotein 40 kDa protein OS=Homo sapiens GN=SNRNP40 PE=1 SV=1	8.65205	9.52381	3	3	3	357	39.286	8.1	5.69645
High	P12273	Prolactin-inducible protein OS=Homo sapiens GN=PIP PE=1 SV=1	8.6141	28.7671	3	3	3	146	16.562	8.05	3.81
High	Q9Y2R9	28S ribosomal protein S7, mitochondrial OS=Homo sapiens GN=MRPS7 PE=1 SV=2	8.61384	9.50413	2	2	2	242	28.116	9.99	4.19203
High	P01860	Ig gamma-3 chain C region OS=Homo sapiens GN=IGHG3 PE=1 SV=2	8.46584	7.69231	3	3	1	377	41.26	7.9	6.58875
High	Q9H0H5	Rac GTPase-activating protein 1 OS=Homo sapiens GN=RACGAP1 PE=1 SV=1	8.30827	5.37975	3	3	3	632	70.982	8.88	3.81098
High	O43663	Protein regulator of cytokinesis 1 OS=Homo sapiens GN=PRC1 PE=1 SV=2	8.23787	8.70968	6	6	5	620	71.562	6.68	5.31314
High	Q9NR30	Nucleolar RNA helicase 2 OS=Homo sapiens GN=DDX21 PE=1 SV=5	8.23539	3.44828	2	2	2	783	87.29	9.28	4.54949
High	Q969G3	SWI/SNF-related matrix-associated actin-dependent regulator of chromatin subfamily E member 1 OS=Homo sapiens GN=SMARCE1 PE=1 SV=2	8.22478	5.59611	2	2	2	411	46.621	4.88	6.2305
High	P12268	Inosine-5'-monophosphate dehydrogenase 2 OS=Homo sapiens GN=IMPDH2 PE=1 SV=2	8.14271	7.393	3	3	3	514	55.77	6.9	4.99192
High	P05089	Arginase-1 OS=Homo sapiens GN=ARG1 PE=1 SV=2	8.05151	14.9068	4	4	4	322	34.713	7.21	4.22511
High	P07339	Cathepsin D OS=Homo sapiens GN=CTSD PE=1 SV=1	8.04551	8.49515	4	4	4	412	44.524	6.54	3.93139
High	O43670	BUB3-interacting and GLEBS motif-containing protein ZNF207 OS=Homo sapiens GN=ZNF207 PE=1 SV=1	7.97042	5.43933	2	3	2	478	50.717	9.1	6.80643
High	P12956	X-ray repair cross-complementing protein 6 OS=Homo sapiens GN=XRCC6 PE=1 SV=2	7.94284	6.40394	3	3	3	609	69.799	6.64	1.7243
High	P61626	Lysozyme C OS=Homo sapiens GN=LYZ PE=1 SV=1	7.93923	13.5135	2	2	2	148	16.526	9.16	2.5897
High	P31689	DnaJ homolog subfamily A member 1 OS=Homo sapiens GN=DNAJA1 PE=1 SV=2	7.83267	8.06045	3	3	3	397	44.839	7.08	2.19982
High	O14974	Protein phosphatase 1 regulatory subunit 12A OS=Homo sapiens GN=PPP1R12A PE=1 SV=1	7.78132	2.23301	2	2	2	1030	115.211	5.4	5.09487
High	Q96RF0	Sorting nexin-18 OS=Homo sapiens GN=SNX18 PE=1 SV=2	7.66199	4.61783	2	2	2	628	68.851	5.68	2.63309
High	Q9NZT1	Calmodulin-like protein 5 OS=Homo sapiens GN=CALML5 PE=1 SV=2	7.62358	21.2329	2	2	2	146	15.883	4.44	3.91619
High	Q96IZ0	PRKC apoptosis WT1 regulator protein OS=Homo sapiens GN=PAWR PE=1 SV=1	7.5499	3.82353	1	1	1	340	36.545	5.41	2.45407
High	P55084	Trifunctional enzyme subunit beta, mitochondrial OS=Homo sapiens GN=HADHB PE=1 SV=3	7.45	4.85232	2	2	2	474	51.262	9.41	2.26468
High	Q9NXC5	WD repeat-containing protein mio OS=Homo sapiens GN=MIOS PE=1 SV=2	7.3755	3.77143	3	3	3	875	98.521	6.73	2.20334
High	Q9Y383	Putative RNA-binding protein Luc7-like 2 OS=Homo sapiens GN=LUC7L2 PE=1 SV=2	7.34029	8.92857	4	4	2	392	46.486	10.01	5.54019
High	P47914	60S ribosomal protein L29 OS=Homo sapiens GN=RPL29 PE=1 SV=2	7.24607	14.4654	2	3	2	159	17.741	11.66	4.19069
High	P00338	L-lactate dehydrogenase A chain OS=Homo sapiens GN=LDHA PE=1 SV=2	7.23876	6.0241	2	2	2	332	36.665	8.27	2.40561
High	Q9Y448	Small kinetochore-associated protein OS=Homo sapiens GN=KNSTRN PE=1 SV=2	7.19299	9.81013	3	3	3	316	35.416	6.3	3.74939
High	Q92888	Rho guanine nucleotide exchange factor 1 OS=Homo sapiens GN=ARHGEF1 PE=1 SV=2	7.12526	2.96053	2	2	2	912	102.371	5.66	4.93052
High	Q9Y265	RuvB-like 1 OS=Homo sapiens GN=RUVBL1 PE=1 SV=1	7.12154	8.33333	3	3	3	456	50.196	6.42	2.34264
High	Q8NE71	ATP-binding cassette sub-family F member 1 OS=Homo sapiens GN=ABCF1 PE=1 SV=2	7.10497	3.43195	2	2	2	845	95.866	6.8	2.27179
High	P25205	DNA replication licensing factor MCM3 OS=Homo sapiens GN=MCM3 PE=1 SV=3	6.9939	4.20792	4	4	4	808	90.924	5.77	1.67704
High	Q9UGY1	Nucleolar protein 12 OS=Homo sapiens GN=NOL12 PE=1 SV=1	6.94661	12.2066	2	2	2	213	24.648	10.23	2.74533
High	Q07666	KH domain-containing, RNA-binding, signal transduction-associated protein 1 OS=Homo sapiens GN=KHDRBS1 PE=1 SV=1	6.93858	3.16027	1	2	1	443	48.197	8.66	5.39015
High	Q9BRS2	Serine/threonine-protein kinase RIO1 OS=Homo sapiens GN=RIOK1 PE=1 SV=2	6.86414	3.87324	2	2	2	568	65.542	6.19	4.65452
High	Q96PK6	RNA-binding protein 14 OS=Homo sapiens GN=RBM14 PE=1 SV=2	6.82231	5.38117	3	3	3	669	69.449	9.67	4.434
High	P81605	Dermcidin OS=Homo sapiens GN=DCD PE=1 SV=2	6.78718	20	2	3	2	110	11.277	6.54	7.27684
High	Q15365	Poly(rC)-binding protein 1 OS=Homo sapiens GN=PCBP1 PE=1 SV=2	6.78226	9.26966	3	3	3	356	37.474	7.09	5.4511
High	Q9UER7	Death domain-associated protein 6 OS=Homo sapiens GN=DAXX PE=1 SV=2	6.70883	3.51351	2	2	2	740	81.323	4.87	2.67517
High	Q92522	Histone H1x OS=Homo sapiens GN=H1FX PE=1 SV=1	6.66938	12.6761	2	2	2	213	22.474	10.76	4.56776
High	P41743	Protein kinase C iota type OS=Homo sapiens GN=PRKCI PE=1 SV=2	6.66703	4.5302	2	2	2	596	68.218	5.85	1.91131
High	Q9UBU8	Mortality factor 4-like protein 1 OS=Homo sapiens GN=MORF4L1 PE=1 SV=2	6.66488	5.8011	2	2	1	362	41.448	9.28	2.58897
High	P04040	Catalase OS=Homo sapiens GN=CAT PE=1 SV=3	6.60776	4.93359	2	2	2	527	59.719	7.39	4.10315
High	P19447	TFIIH basal transcription factor complex helicase XPB subunit OS=Homo sapiens GN=ERCC3 PE=1 SV=1	6.5653	4.60358	3	3	3	782	89.221	7.23	4.06694
High	P32780	General transcription factor IIH subunit 1 OS=Homo sapiens GN=GTF2H1 PE=1 SV=1	6.55482	3.83212	2	2	2	548	61.993	8.66	2.10211
High	P50990	T-complex protein 1 subunit theta OS=Homo sapiens GN=CCT8 PE=1 SV=4	6.49583	3.64964	2	2	2	548	59.583	5.6	3.54947
High	P52292	Importin subunit alpha-1 OS=Homo sapiens GN=KPNA2 PE=1 SV=1	6.40327	6.04915	2	2	2	529	57.826	5.4	0
High	Q5T749	Keratinocyte proline-rich protein OS=Homo sapiens GN=KPRP PE=1 SV=1	6.38712	2.9361	2	3	2	579	64.093	8.27	4.52154
High	P20930	Filaggrin OS=Homo sapiens GN=FLG PE=1 SV=3	6.35325	0.467865	2	2	2	4061	434.922	9.25	4.6386
High	P42166	Lamina-associated polypeptide 2, isoform alpha OS=Homo sapiens GN=TMPO PE=1 SV=2	6.30986	4.17867	2	2	2	694	75.446	7.66	4.10074
High	P62269	40S ribosomal protein S18 OS=Homo sapiens GN=RPS18 PE=1 SV=3	6.29487	15.7895	3	3	3	152	17.708	10.99	1.91704
High	P01040	Cystatin-A OS=Homo sapiens GN=CSTA PE=1 SV=1	6.2915	25.5102	2	2	2	98	11	5.5	4.35765
High	Q96A08	Histone H2B type 1-A OS=Homo sapiens GN=HIST1H2BA PE=1 SV=3	6.19921	8.66142	1	2	1	127	14.159	10.32	4.898
High	Q9NRZ9	Lymphoid-specific helicase OS=Homo sapiens GN=HELLS PE=1 SV=1	6.19631	2.6253	2	2	2	838	97.012	7.93	1.93319
High	O43660	Pleiotropic regulator 1 OS=Homo sapiens GN=PLRG1 PE=1 SV=1	6.05598	2.33463	1	2	1	514	57.158	9.17	1.77364
High	Q15427	Splicing factor 3B subunit 4 OS=Homo sapiens GN=SF3B4 PE=1 SV=1	5.98213	3.30189	1	1	1	424	44.357	8.56	3.48565
High	Q13573	SNW domain-containing protein 1 OS=Homo sapiens GN=SNW1 PE=1 SV=1	5.9681	5.59701	2	2	2	536	61.456	9.52	2.23243
High	Q99661	Kinesin-like protein KIF2C OS=Homo sapiens GN=KIF2C PE=1 SV=2	5.95577	4.82759	3	3	2	725	81.261	7.83	4.27546
High	P26599	Polypyrimidine tract-binding protein 1 OS=Homo sapiens GN=PTBP1 PE=1 SV=1	5.93119	4.7081	3	3	3	531	57.186	9.17	2.47871
High	P04083	Annexin A1 OS=Homo sapiens GN=ANXA1 PE=1 SV=2	5.89757	4.62428	1	1	1	346	38.69	7.02	2.81473
High	P13639	Elongation factor 2 OS=Homo sapiens GN=EEF2 PE=1 SV=4	5.87365	3.4965	3	3	3	858	95.277	6.83	4.25629
High	Q9NVU7	Protein SDA1 homolog OS=Homo sapiens GN=SDAD1 PE=1 SV=3	5.85133	3.05677	2	2	2	687	79.82	9.25	4.19337
High	Q9H8G2	Caspase activity and apoptosis inhibitor 1 OS=Homo sapiens GN=CAAP1 PE=1 SV=2	5.83375	6.6482	2	2	2	361	38.344	4.72	4.13859
High	P10599	Thioredoxin OS=Homo sapiens GN=TXN PE=1 SV=3	5.78773	20.9524	2	2	2	105	11.73	4.92	2.6409
High	Q9HCY8	Protein S100-A14 OS=Homo sapiens GN=S100A14 PE=1 SV=1	5.78489	14.4231	1	1	1	104	11.655	5.24	2.68819
High	O60828	Polyglutamine-binding protein 1 OS=Homo sapiens GN=PQBP1 PE=1 SV=1	5.69508	4.5283	1	1	1	265	30.454	6.33	2.54093
High	O75874	Isocitrate dehydrogenase [NADP] cytoplasmic OS=Homo sapiens GN=IDH1 PE=1 SV=2	5.66878	3.1401	1	1	1	414	46.63	7.01	2.10648
High	P00734	Prothrombin OS=Homo sapiens GN=F2 PE=1 SV=2	5.59676	3.85852	2	2	2	622	69.992	5.9	2.54947
High	Q96CW1	AP-2 complex subunit mu OS=Homo sapiens GN=AP2M1 PE=1 SV=2	5.56139	5.28736	3	3	3	435	49.623	9.54	3.46409
High	P0DN76	Splicing factor U2AF 35 kDa subunit-like protein OS=Homo sapiens GN=U2AF1L5 PE=3 SV=1	5.55658	5.41667	1	1	1	240	27.854	8.81	3.12461
High	Q05519	Serine/arginine-rich splicing factor 11 OS=Homo sapiens GN=SRSF11 PE=1 SV=1	5.40424	6.40496	2	2	2	484	53.51	10.52	2.55553
High	Q92925	SWI/SNF-related matrix-associated actin-dependent regulator of chromatin subfamily D member 2 OS=Homo sapiens GN=SMARCD2 PE=1 SV=3	5.39413	6.21469	2	2	2	531	58.884	9.64	3.07272
High	Q9NWB6	Arginine and glutamate-rich protein 1 OS=Homo sapiens GN=ARGLU1 PE=1 SV=1	5.20718	8.42491	3	3	3	273	33.197	10.35	5.78508
High	P57772	Selenocysteine-specific elongation factor OS=Homo sapiens GN=EEFSEC PE=1 SV=4	5.18092	2.18121	1	1	1	596	65.263	8.35	2.20499
High	O75400	Pre-mRNA-processing factor 40 homolog A OS=Homo sapiens GN=PRPF40A PE=1 SV=2	5.16786	2.82132	3	3	3	957	108.737	7.56	3.73148
High	O94806	Serine/threonine-protein kinase D3 OS=Homo sapiens GN=PRKD3 PE=1 SV=1	5.14363	1.57303	1	1	1	890	100.406	6.87	2.61812
High	P22626	Heterogeneous nuclear ribonucleoproteins A2/B1 OS=Homo sapiens GN=HNRNPA2B1 PE=1 SV=2	5.12945	4.24929	1	2	1	353	37.407	8.95	2.05941
High	P60842	Eukaryotic initiation factor 4A-I OS=Homo sapiens GN=EIF4A1 PE=1 SV=1	5.01679	4.6798	2	2	2	406	46.125	5.48	4.28925
High	P48426	Phosphatidylinositol 5-phosphate 4-kinase type-2 alpha OS=Homo sapiens GN=PIP4K2A PE=1 SV=2	4.97805	5.17241	2	2	2	406	46.195	6.99	4.1422
High	Q96PY5	Formin-like protein 2 OS=Homo sapiens GN=FMNL2 PE=1 SV=3	4.96111	2.02578	2	2	1	1086	123.243	7.4	1.89709
High	Q9NRX1	RNA-binding protein PNO1 OS=Homo sapiens GN=PNO1 PE=1 SV=1	4.89722	6.34921	1	1	1	252	27.907	9.73	2.71349
High	Q66PJ3	ADP-ribosylation factor-like protein 6-interacting protein 4 OS=Homo sapiens GN=ARL6IP4 PE=1 SV=2	4.8755	3.80048	1	1	1	421	44.888	10.93	3.04218
High	O94832	Unconventional myosin-Id OS=Homo sapiens GN=MYO1D PE=1 SV=2	4.78391	1.68986	2	2	2	1006	116.129	9.39	3.42713
High	P52272	Heterogeneous nuclear ribonucleoprotein M OS=Homo sapiens GN=HNRNPM PE=1 SV=3	4.6768	2.60274	2	2	2	730	77.464	8.7	1.6008
High	Q8NCA5	Protein FAM98A OS=Homo sapiens GN=FAM98A PE=1 SV=1	4.6293	2.89017	1	1	1	519	55.366	9.03	2.1823
High	O95251	Histone acetyltransferase KAT7 OS=Homo sapiens GN=KAT7 PE=1 SV=1	4.60467	2.45499	1	1	1	611	70.598	8.85	2.31019
High	P23528	Cofilin-1 OS=Homo sapiens GN=CFL1 PE=1 SV=3	4.56735	6.62651	1	1	1	166	18.491	8.09	2.13828
High	Q8WWM7	Ataxin-2-like protein OS=Homo sapiens GN=ATXN2L PE=1 SV=2	4.55956	1.5814	1	1	1	1075	113.304	8.59	2.45698
High	P62857	40S ribosomal protein S28 OS=Homo sapiens GN=RPS28 PE=1 SV=1	4.53581	17.3913	1	1	1	69	7.836	10.7	2.26673
High	P09651	Heterogeneous nuclear ribonucleoprotein A1 OS=Homo sapiens GN=HNRNPA1 PE=1 SV=5	4.50807	9.94624	3	3	3	372	38.723	9.13	1.82033
High	P00367	Glutamate dehydrogenase 1, mitochondrial OS=Homo sapiens GN=GLUD1 PE=1 SV=2	4.47198	1.97133	1	1	1	558	61.359	7.8	2.20608
High	Q9H0U3	Magnesium transporter protein 1 OS=Homo sapiens GN=MAGT1 PE=1 SV=1	4.43901	2.98507	1	2	1	335	38.011	9.63	0
High	Q8N1G4	Leucine-rich repeat-containing protein 47 OS=Homo sapiens GN=LRRC47 PE=1 SV=1	4.34901	3.08748	1	1	1	583	63.434	8.28	2.31124
High	Q9BVP2	Guanine nucleotide-binding protein-like 3 OS=Homo sapiens GN=GNL3 PE=1 SV=2	4.26835	5.64663	3	3	3	549	61.954	9.16	3.49824
High	Q96G21	U3 small nucleolar ribonucleoprotein protein IMP4 OS=Homo sapiens GN=IMP4 PE=1 SV=1	4.26816	5.49828	2	2	2	291	33.736	9.47	2.10192
High	Q96KB5	Lymphokine-activated killer T-cell-originated protein kinase OS=Homo sapiens GN=PBK PE=1 SV=3	4.19716	3.72671	1	1	1	322	36.062	5.12	2.85164
High	P38159	RNA-binding motif protein, X chromosome OS=Homo sapiens GN=RBMX PE=1 SV=3	4.1689	3.32481	1	1	1	391	42.306	10.05	2.49482
High	Q07955	Serine/arginine-rich splicing factor 1 OS=Homo sapiens GN=SRSF1 PE=1 SV=2	4.16783	9.27419	2	2	2	248	27.728	10.36	2.33862
High	Q96EY1	DnaJ homolog subfamily A member 3, mitochondrial OS=Homo sapiens GN=DNAJA3 PE=1 SV=2	4.16611	5.83333	2	2	2	480	52.456	9.26	2.01467
High	Q13268	Dehydrogenase/reductase SDR family member 2, mitochondrial OS=Homo sapiens GN=DHRS2 PE=1 SV=4	4.15163	6.07143	1	1	1	280	29.908	9.01	2.3923
High	B9A064	Immunoglobulin lambda-like polypeptide 5 OS=Homo sapiens GN=IGLL5 PE=2 SV=2	4.09827	7.00935	1	1	1	214	23.049	8.84	0
High	Q49MG5	Microtubule-associated protein 9 OS=Homo sapiens GN=MAP9 PE=1 SV=3	4.08672	1.5456	1	1	1	647	74.189	7.8	2.92271
High	P02545	Prelamin-A/C OS=Homo sapiens GN=LMNA PE=1 SV=1	4.08328	1.50602	1	1	1	664	74.095	7.02	1.88844
High	P60900	Proteasome subunit alpha type-6 OS=Homo sapiens GN=PSMA6 PE=1 SV=1	4.06961	7.31707	1	1	1	246	27.382	6.76	2.92679
High	Q6DD87	Zinc finger protein 787 OS=Homo sapiens GN=ZNF787 PE=1 SV=3	4.06429	3.13316	1	1	1	383	40.518	7.84	2.03672
High	P62917	60S ribosomal protein L8 OS=Homo sapiens GN=RPL8 PE=1 SV=2	4.02502	5.83658	3	3	3	257	28.007	11.03	4.11031
High	P0DMU6	Cancer/testis antigen family 45 member A4 OS=Homo sapiens GN=CT45A4 PE=2 SV=1	3.99825	10.582	2	2	2	189	21.231	9.76	0
High	Q15306	Interferon regulatory factor 4 OS=Homo sapiens GN=IRF4 PE=1 SV=1	3.95861	2.21729	1	1	1	451	51.739	6.86	2.03751
High	Q9HCM4	Band 4.1-like protein 5 OS=Homo sapiens GN=EPB41L5 PE=1 SV=3	3.94962	1.90996	1	1	1	733	81.805	6.58	2.2129
High	Q9P2N5	RNA-binding protein 27 OS=Homo sapiens GN=RBM27 PE=1 SV=2	3.93851	1.50943	2	2	2	1060	118.645	9.19	1.61048
High	P02788	Lactotransferrin OS=Homo sapiens GN=LTF PE=1 SV=6	3.78629	2.67606	2	2	2	710	78.132	8.12	3.45203
High	O43684	Mitotic checkpoint protein BUB3 OS=Homo sapiens GN=BUB3 PE=1 SV=1	3.77398	7.31707	2	2	2	328	37.131	6.84	3.83662
High	Q8N684	Cleavage and polyadenylation specificity factor subunit 7 OS=Homo sapiens GN=CPSF7 PE=1 SV=1	3.74473	2.33546	1	1	1	471	52.018	8	2.28951
High	P30153	Serine/threonine-protein phosphatase 2A 65 kDa regulatory subunit A alpha isoform OS=Homo sapiens GN=PPP2R1A PE=1 SV=4	3.74208	1.69779	1	1	1	589	65.267	5.11	2.06098
High	P47755	F-actin-capping protein subunit alpha-2 OS=Homo sapiens GN=CAPZA2 PE=1 SV=3	3.73886	8.74126	2	2	1	286	32.929	5.85	0
High	Q14232	Translation initiation factor eIF-2B subunit alpha OS=Homo sapiens GN=EIF2B1 PE=1 SV=1	3.71354	3.93443	1	1	1	305	33.691	7.33	2.29047
High	P63244	Receptor of activated protein C kinase 1 OS=Homo sapiens GN=RACK1 PE=1 SV=3	3.67415	7.25552	2	2	2	317	35.055	7.69	2.13015
High	Q9BZL6	Serine/threonine-protein kinase D2 OS=Homo sapiens GN=PRKD2 PE=1 SV=2	3.62746	1.13895	1	1	1	878	96.689	6.84	2.12987
High	Q96JM7	Lethal(3)malignant brain tumor-like protein 3 OS=Homo sapiens GN=L3MBTL3 PE=1 SV=2	3.59894	1.66667	1	1	1	780	88.28	6.46	0
High	Q13889	General transcription factor IIH subunit 3 OS=Homo sapiens GN=GTF2H3 PE=1 SV=2	3.56193	6.49351	1	1	1	308	34.356	7.02	1.94054
High	O75223	Gamma-glutamylcyclotransferase OS=Homo sapiens GN=GGCT PE=1 SV=1	3.5397	5.31915	1	1	1	188	20.994	5.14	2.0069
High	P69905	Hemoglobin subunit alpha OS=Homo sapiens GN=HBA1 PE=1 SV=2	3.53062	6.33803	1	1	1	142	15.248	8.68	1.98582
High	P22735	Protein-glutamine gamma-glutamyltransferase K OS=Homo sapiens GN=TGM1 PE=1 SV=4	3.52823	2.81518	2	2	2	817	89.73	6.04	1.62375
High	Q8IWB9	Testis-expressed sequence 2 protein OS=Homo sapiens GN=TEX2 PE=1 SV=2	3.52608	0.79858	1	1	1	1127	125.224	6.01	1.83006
High	P42766	60S ribosomal protein L35 OS=Homo sapiens GN=RPL35 PE=1 SV=2	3.49255	8.13008	1	1	1	123	14.543	11.05	2.58744
High	Q9UI42	Carboxypeptidase A4 OS=Homo sapiens GN=CPA4 PE=1 SV=2	3.4902	4.27553	2	2	2	421	47.322	6.7	0
High	P49770	Translation initiation factor eIF-2B subunit beta OS=Homo sapiens GN=EIF2B2 PE=1 SV=3	3.46701	6.55271	2	2	2	351	38.965	6.16	1.88972
High	Q9UBP9	PTB domain-containing engulfment adapter protein 1 OS=Homo sapiens GN=GULP1 PE=1 SV=1	3.4588	2.96053	1	1	1	304	34.468	7.9	2.20896
High	P31025	Lipocalin-1 OS=Homo sapiens GN=LCN1 PE=1 SV=1	3.44904	6.25	1	1	1	176	19.238	5.58	2.29635
High	Q9BTD8	RNA-binding protein 42 OS=Homo sapiens GN=RBM42 PE=1 SV=1	3.43098	3.54167	1	1	1	480	50.382	9.63	0
High	Q07065	Cytoskeleton-associated protein 4 OS=Homo sapiens GN=CKAP4 PE=1 SV=2	3.39892	1.99336	1	1	1	602	65.983	5.92	0
High	Q00325	Phosphate carrier protein, mitochondrial OS=Homo sapiens GN=SLC25A3 PE=1 SV=2	3.39351	3.31492	1	1	1	362	40.069	9.38	1.74953
High	P04843	Dolichyl-diphosphooligosaccharide--protein glycosyltransferase subunit 1 OS=Homo sapiens GN=RPN1 PE=1 SV=1	3.37284	2.14168	1	1	1	607	68.527	6.38	0
High	Q15366	Poly(rC)-binding protein 2 OS=Homo sapiens GN=PCBP2 PE=1 SV=1	3.30865	3.56164	1	1	1	365	38.556	6.79	0
High	O60506	Heterogeneous nuclear ribonucleoprotein Q OS=Homo sapiens GN=SYNCRIP PE=1 SV=2	3.28982	3.37079	2	2	2	623	69.56	8.59	0
High	Q8IY17	Neuropathy target esterase OS=Homo sapiens GN=PNPLA6 PE=1 SV=2	3.28462	1.97657	3	3	3	1366	149.9	7.81	1.66513
High	Q13510	Acid ceramidase OS=Homo sapiens GN=ASAH1 PE=1 SV=5	3.25932	2.78481	1	1	1	395	44.631	7.62	1.63413
High	P62861	40S ribosomal protein S30 OS=Homo sapiens GN=FAU PE=1 SV=1	3.24718	16.9492	1	1	1	59	6.644	12.15	1.80285
High	O43818	U3 small nucleolar RNA-interacting protein 2 OS=Homo sapiens GN=RRP9 PE=1 SV=1	3.24596	2.10526	1	1	1	475	51.809	7.85	2.14079
High	Q5T3I0	G patch domain-containing protein 4 OS=Homo sapiens GN=GPATCH4 PE=1 SV=2	3.19928	3.58744	1	1	1	446	50.351	9.63	0
High	Q14574	Desmocollin-3 OS=Homo sapiens GN=DSC3 PE=1 SV=3	3.14448	1.00446	1	1	1	896	99.906	6.1	2.1171
High	Q9H0S4	Probable ATP-dependent RNA helicase DDX47 OS=Homo sapiens GN=DDX47 PE=1 SV=1	3.11623	2.63736	1	1	1	455	50.615	9.1	0
High	Q9HBG7	T-lymphocyte surface antigen Ly-9 OS=Homo sapiens GN=LY9 PE=1 SV=3	3.10425	1.37405	1	1	1	655	72.094	5.52	1.92934
High	P40939	Trifunctional enzyme subunit alpha, mitochondrial OS=Homo sapiens GN=HADHA PE=1 SV=2	3.09845	3.27654	2	2	2	763	82.947	9.04	2.22388
High	Q15517	Corneodesmosin OS=Homo sapiens GN=CDSN PE=1 SV=3	3.08171	3.40265	1	1	1	529	51.49	8.35	2.07654
High	P49368	T-complex protein 1 subunit gamma OS=Homo sapiens GN=CCT3 PE=1 SV=4	3.06974	3.85321	2	2	2	545	60.495	6.49	0
High	P16989	Y-box-binding protein 3 OS=Homo sapiens GN=YBX3 PE=1 SV=4	3.05173	3.49462	1	1	1	372	40.066	9.77	0
High	Q12923	Tyrosine-protein phosphatase non-receptor type 13 OS=Homo sapiens GN=PTPN13 PE=1 SV=2	2.99311	0.56338	1	1	1	2485	276.733	6.42	1.64554
High	Q09028	Histone-binding protein RBBP4 OS=Homo sapiens GN=RBBP4 PE=1 SV=3	2.97551	2.82353	1	1	1	425	47.626	4.89	1.7692
High	Q14978	Nucleolar and coiled-body phosphoprotein 1 OS=Homo sapiens GN=NOLC1 PE=1 SV=2	2.92555	1.57368	1	1	1	699	73.56	9.47	0
High	P83111	Serine beta-lactamase-like protein LACTB, mitochondrial OS=Homo sapiens GN=LACTB PE=1 SV=2	2.91721	2.01097	1	1	1	547	60.655	8.53	0
High	P17987	T-complex protein 1 subunit alpha OS=Homo sapiens GN=TCP1 PE=1 SV=1	2.88207	1.79856	1	1	1	556	60.306	6.11	2.2774
High	Q13283	Ras GTPase-activating protein-binding protein 1 OS=Homo sapiens GN=G3BP1 PE=1 SV=1	2.88174	3.86266	1	1	1	466	52.132	5.52	1.61476
High	Q16543	Hsp90 co-chaperone Cdc37 OS=Homo sapiens GN=CDC37 PE=1 SV=1	2.87484	4.49735	1	1	1	378	44.44	5.25	0
High	P06396	Gelsolin OS=Homo sapiens GN=GSN PE=1 SV=1	2.87006	2.42967	2	2	2	782	85.644	6.28	1.65107
High	P78549	Endonuclease III-like protein 1 OS=Homo sapiens GN=NTHL1 PE=1 SV=2	2.85886	5.44872	1	1	1	312	34.368	9.67	0
High	Q01469	Fatty acid-binding protein, epidermal OS=Homo sapiens GN=FABP5 PE=1 SV=3	2.85449	6.66667	1	1	1	135	15.155	7.01	0
High	O75190	DnaJ homolog subfamily B member 6 OS=Homo sapiens GN=DNAJB6 PE=1 SV=2	2.85171	3.98773	1	1	1	326	36.065	9.16	1.63354
High	Q9Y230	RuvB-like 2 OS=Homo sapiens GN=RUVBL2 PE=1 SV=3	2.84986	2.59179	1	1	1	463	51.125	5.64	0
High	Q12905	Interleukin enhancer-binding factor 2 OS=Homo sapiens GN=ILF2 PE=1 SV=2	2.82218	3.07692	1	1	1	390	43.035	5.26	1.61
High	O95104	Splicing factor, arginine/serine-rich 15 OS=Homo sapiens GN=SCAF4 PE=1 SV=3	2.80939	1.39494	1	1	1	1147	125.79	9.55	2.02193
High	O75683	Surfeit locus protein 6 OS=Homo sapiens GN=SURF6 PE=1 SV=3	2.7612	3.04709	1	1	1	361	41.426	10.64	1.64888
High	P61289	Proteasome activator complex subunit 3 OS=Homo sapiens GN=PSME3 PE=1 SV=1	2.67551	4.33071	1	1	1	254	29.488	5.95	1.82307
High	Q96GM8	Target of EGR1 protein 1 OS=Homo sapiens GN=TOE1 PE=1 SV=1	2.67531	1.76471	1	1	1	510	56.512	7.18	2.04325
High	Q9ULW3	Activator of basal transcription 1 OS=Homo sapiens GN=ABT1 PE=1 SV=1	2.60783	2.94118	1	1	1	272	31.06	9.88	0
High	Q12894	Interferon-related developmental regulator 2 OS=Homo sapiens GN=IFRD2 PE=1 SV=3	2.60695	1.77866	1	1	1	506	54.779	7.94	1.76745
High	P26196	Probable ATP-dependent RNA helicase DDX6 OS=Homo sapiens GN=DDX6 PE=1 SV=2	2.59517	2.27743	1	1	1	483	54.382	8.66	0
High	Q13045	Protein flightless-1 homolog OS=Homo sapiens GN=FLII PE=1 SV=2	2.59312	0.788022	1	1	1	1269	144.659	6.05	0
High	Q5HYJ3	Protein FAM76B OS=Homo sapiens GN=FAM76B PE=1 SV=3	2.5862	3.24484	1	1	1	339	38.683	9.25	0
High	O95816	BAG family molecular chaperone regulator 2 OS=Homo sapiens GN=BAG2 PE=1 SV=1	2.56527	4.2654	1	1	1	211	23.757	6.7	1.75119
High	Q14103	Heterogeneous nuclear ribonucleoprotein D0 OS=Homo sapiens GN=HNRNPD PE=1 SV=1	2.5632	3.94366	1	1	1	355	38.41	7.81	2.07877
High	Q8N1F7	Nuclear pore complex protein Nup93 OS=Homo sapiens GN=NUP93 PE=1 SV=2	2.56177	1.4652	1	1	1	819	93.43	5.72	1.62507
High	Q9Y5M8	Signal recognition particle receptor subunit beta OS=Homo sapiens GN=SRPRB PE=1 SV=3	2.5318	7.01107	1	1	1	271	29.684	9.04	0
High	P14625	Endoplasmin OS=Homo sapiens GN=HSP90B1 PE=1 SV=1	2.46903	1.24533	1	1	1	803	92.411	4.84	1.72412
High	Q96CT7	Coiled-coil domain-containing protein 124 OS=Homo sapiens GN=CCDC124 PE=1 SV=1	2.45717	3.58744	1	1	1	223	25.82	9.54	0
High	P07910	Heterogeneous nuclear ribonucleoproteins C1/C2 OS=Homo sapiens GN=HNRNPC PE=1 SV=4	2.44916	3.26797	1	1	1	306	33.65	5.08	1.85741
High	Q53EL6	Programmed cell death protein 4 OS=Homo sapiens GN=PDCD4 PE=1 SV=2	2.44334	2.34542	1	1	1	469	51.703	5.21	0
High	Q9UNF1	Melanoma-associated antigen D2 OS=Homo sapiens GN=MAGED2 PE=1 SV=2	2.44177	2.14521	1	1	1	606	64.914	9.32	0
High	O14950	Myosin regulatory light chain 12B OS=Homo sapiens GN=MYL12B PE=1 SV=2	2.43403	5.81395	1	1	1	172	19.767	4.84	0
High	P62913	60S ribosomal protein L11 OS=Homo sapiens GN=RPL11 PE=1 SV=2	2.41206	5.05618	1	1	1	178	20.24	9.6	1.8268
High	Q53H12	Acylglycerol kinase, mitochondrial OS=Homo sapiens GN=AGK PE=1 SV=2	2.40927	2.8436	1	1	1	422	47.107	8.09	0
High	Q9NWS0	PIH1 domain-containing protein 1 OS=Homo sapiens GN=PIH1D1 PE=1 SV=1	2.39707	4.82759	1	2	1	290	32.342	5.14	0
High	Q92769	Histone deacetylase 2 OS=Homo sapiens GN=HDAC2 PE=1 SV=2	2.39025	3.68852	2	2	2	488	55.329	5.91	0
High	P05090	Apolipoprotein D OS=Homo sapiens GN=APOD PE=1 SV=1	2.38567	9.52381	2	2	2	189	21.262	5.15	0
High	Q9BYE4	Small proline-rich protein 2G OS=Homo sapiens GN=SPRR2G PE=3 SV=1	2.338	17.8082	1	1	1	73	8.152	7.96	1.95778
High	Q5F1R6	DnaJ homolog subfamily C member 21 OS=Homo sapiens GN=DNAJC21 PE=1 SV=2	2.28441	2.44821	1	1	1	531	61.989	5.47	0
High	Q9H307	Pinin OS=Homo sapiens GN=PNN PE=1 SV=4	2.22841	1.11576	1	1	1	717	81.565	7.14	0
High	P11279	Lysosome-associated membrane glycoprotein 1 OS=Homo sapiens GN=LAMP1 PE=1 SV=3	2.2107	2.63789	1	1	1	417	44.854	8.75	2.28726
High	O60231	Putative pre-mRNA-splicing factor ATP-dependent RNA helicase DHX16 OS=Homo sapiens GN=DHX16 PE=1 SV=2	2.18749	0.67243	1	1	1	1041	119.189	6.8	0
High	O75940	Survival of motor neuron-related-splicing factor 30 OS=Homo sapiens GN=SMNDC1 PE=1 SV=1	2.18635	5.04202	1	1	1	238	26.694	7.24	0
High	O75153	Clustered mitochondria protein homolog OS=Homo sapiens GN=CLUH PE=1 SV=2	2.1764	0.763942	1	1	1	1309	146.577	6.13	0
High	Q03001	Dystonin OS=Homo sapiens GN=DST PE=1 SV=4	2.15521	0.10568	1	1	1	7570	860.127	5.25	0
High	Q9H147	Deoxynucleotidyltransferase terminal-interacting protein 1 OS=Homo sapiens GN=DNTTIP1 PE=1 SV=2	2.1164	3.64742	1	1	1	329	36.99	8.97	0
High	Q6SPF0	Atherin OS=Homo sapiens GN=SAMD1 PE=1 SV=1	2.06103	1.48699	1	1	1	538	56.018	7.58	2.03964
High	Q13867	Bleomycin hydrolase OS=Homo sapiens GN=BLMH PE=1 SV=1	2	2.41758	1	1	1	455	52.528	6.27	0
High	O14776	Transcription elongation regulator 1 OS=Homo sapiens GN=TCERG1 PE=1 SV=2	1.98632	0.819672	1	1	1	1098	123.823	8.65	0
High	Q8TB52	F-box only protein 30 OS=Homo sapiens GN=FBXO30 PE=1 SV=3	1.96537	1.20805	1	1	1	745	82.251	5.4	0
High	Q9BVJ6	U3 small nucleolar RNA-associated protein 14 homolog A OS=Homo sapiens GN=UTP14A PE=1 SV=1	1.96098	1.42672	1	1	1	771	87.924	7.87	0
High	P09012	U1 small nuclear ribonucleoprotein A OS=Homo sapiens GN=SNRPA PE=1 SV=3	1.95273	2.83688	1	1	1	282	31.259	9.83	0
High	Q9NYV4	Cyclin-dependent kinase 12 OS=Homo sapiens GN=CDK12 PE=1 SV=2	1.945	0.872483	1	1	1	1490	164.054	9.44	1.61734
High	Q6ZVX7	F-box only protein 50 OS=Homo sapiens GN=NCCRP1 PE=1 SV=1	1.88439	3.63636	1	1	1	275	30.828	6.62	0
High	P62263	40S ribosomal protein S14 OS=Homo sapiens GN=RPS14 PE=1 SV=3	1.88406	7.28477	1	1	1	151	16.263	10.05	2.05072
High	Q8WXE9	Stonin-2 OS=Homo sapiens GN=STON2 PE=1 SV=1	1.8636	0.994475	1	1	1	905	101.102	5.39	1.92428
High	Q06265	Exosome complex component RRP45 OS=Homo sapiens GN=EXOSC9 PE=1 SV=3	1.85201	2.50569	1	1	1	439	48.918	5.29	0
High	Q9H6R4	Nucleolar protein 6 OS=Homo sapiens GN=NOL6 PE=1 SV=2	1.83121	1.39616	1	1	1	1146	127.513	7.64	1.72169
High	Q14244	Ensconsin OS=Homo sapiens GN=MAP7 PE=1 SV=1	1.83121	1.73565	1	1	1	749	84.002	9.61	0
High	P07737	Profilin-1 OS=Homo sapiens GN=PFN1 PE=1 SV=2	1.78781	8.57143	1	1	1	140	15.045	8.27	1.81422
High	P61619	Protein transport protein Sec61 subunit alpha isoform 1 OS=Homo sapiens GN=SEC61A1 PE=1 SV=2	1.76802	2.10084	1	1	1	476	52.231	8.06	0
High	Q7Z417	Nuclear fragile X mental retardation-interacting protein 2 OS=Homo sapiens GN=NUFIP2 PE=1 SV=1	1.75105	2.01439	1	1	1	695	76.075	8.7	0
High	Q9H6F5	Coiled-coil domain-containing protein 86 OS=Homo sapiens GN=CCDC86 PE=1 SV=1	1.7428	2.22222	1	1	1	360	40.211	10.33	0
High	Q02383	Semenogelin-2 OS=Homo sapiens GN=SEMG2 PE=1 SV=1	1.68655	3.78007	1	1	1	582	65.405	9.07	0
High	Q15637	Splicing factor 1 OS=Homo sapiens GN=SF1 PE=1 SV=4	1.67244	2.50391	1	1	1	639	68.286	8.98	0
High	P08758	Annexin A5 OS=Homo sapiens GN=ANXA5 PE=1 SV=2	1.66878	2.8125	1	1	1	320	35.914	5.05	0
High	P62851	40S ribosomal protein S25 OS=Homo sapiens GN=RPS25 PE=1 SV=1	1.66354	8	1	1	1	125	13.734	10.11	0
Medium	Q8IYB3	Serine/arginine repetitive matrix protein 1 OS=Homo sapiens GN=SRRM1 PE=1 SV=2	1.63414	1.10619	1	1	1	904	102.274	11.84	1.60028
Medium	P31949	Protein S100-A11 OS=Homo sapiens GN=S100A11 PE=1 SV=2	1.61208	8.57143	1	1	1	105	11.733	7.12	0
Medium	P15927	Replication protein A 32 kDa subunit OS=Homo sapiens GN=RPA2 PE=1 SV=1	1.59278	4.44444	1	1	1	270	29.228	6.15	1.84564
Medium	Q8ND56	Protein LSM14 homolog A OS=Homo sapiens GN=LSM14A PE=1 SV=3	1.59227	2.15983	1	1	1	463	50.499	9.52	0
Medium	O00339	Matrilin-2 OS=Homo sapiens GN=MATN2 PE=1 SV=4	1.57692	1.15063	1	1	1	956	106.767	6.27	1.65498
Medium	P18754	Regulator of chromosome condensation OS=Homo sapiens GN=RCC1 PE=1 SV=1	1.54683	2.3753	1	1	1	421	44.941	7.52	1.96482
Medium	O15455	Toll-like receptor 3 OS=Homo sapiens GN=TLR3 PE=1 SV=1	1.53775	1.10619	1	1	1	904	103.763	7.18	1.76377
Medium	Q8TAA3	Proteasome subunit alpha type-7-like OS=Homo sapiens GN=PSMA8 PE=2 SV=3	1.51942	4.29688	1	1	1	256	28.512	8.98	1.65428
Medium	Q9H160	Inhibitor of growth protein 2 OS=Homo sapiens GN=ING2 PE=1 SV=2	1.51899	2.5	1	1	1	280	32.787	7.9	0
Medium	Q5T750	Skin-specific protein 32 OS=Homo sapiens GN=XP32 PE=1 SV=1	1.51813	3.2	1	1	1	250	26.219	7.97	1.86375
Medium	Q96CB9	5-methylcytosine rRNA methyltransferase NSUN4 OS=Homo sapiens GN=NSUN4 PE=1 SV=2	1.50432	2.86458	1	1	1	384	43.061	8.18	1.66089
Medium	P04075	Fructose-bisphosphate aldolase A OS=Homo sapiens GN=ALDOA PE=1 SV=2	1.49894	1.92308	1	1	1	364	39.395	8.09	2.01902
Medium	Q13838	Spliceosome RNA helicase DDX39B OS=Homo sapiens GN=DDX39B PE=1 SV=1	1.49839	1.63551	1	1	1	428	48.96	5.67	0
Medium	P11182	Lipoamide acyltransferase component of branched-chain alpha-keto acid dehydrogenase complex, mitochondrial OS=Homo sapiens GN=DBT PE=1 SV=3	1.49798	1.86722	1	1	1	482	53.453	8.51	0
Medium	Q8IWX8	Calcium homeostasis endoplasmic reticulum protein OS=Homo sapiens GN=CHERP PE=1 SV=3	1.49228	0.764192	1	1	1	916	103.637	9.04	0
Medium	P46782	40S ribosomal protein S5 OS=Homo sapiens GN=RPS5 PE=1 SV=4	1.48999	4.41176	1	1	1	204	22.862	9.72	1.98049
Medium	Q9Y399	28S ribosomal protein S2, mitochondrial OS=Homo sapiens GN=MRPS2 PE=1 SV=1	1.4832	2.7027	1	1	1	296	33.228	9.26	1.74893
Medium	P59665	Neutrophil defensin 1 OS=Homo sapiens GN=DEFA1 PE=1 SV=1	1.4769	9.57447	1	1	1	94	10.194	6.99	1.74995
Medium	P55036	26S proteasome non-ATPase regulatory subunit 4 OS=Homo sapiens GN=PSMD4 PE=1 SV=1	1.4642	3.18302	1	1	1	377	40.711	4.79	0
Medium	Q13151	Heterogeneous nuclear ribonucleoprotein A0 OS=Homo sapiens GN=HNRNPA0 PE=1 SV=1	1.42308	4.2623	1	1	1	305	30.822	9.29	1.84488
Medium	O95400	CD2 antigen cytoplasmic tail-binding protein 2 OS=Homo sapiens GN=CD2BP2 PE=1 SV=1	1.40671	5.57185	1	1	1	341	37.623	4.61	0
Medium	P31948	Stress-induced-phosphoprotein 1 OS=Homo sapiens GN=STIP1 PE=1 SV=1	1.4011	1.28913	1	1	1	543	62.599	6.8	0
Medium	Q96NY9	Crossover junction endonuclease MUS81 OS=Homo sapiens GN=MUS81 PE=1 SV=3	1.39837	2.90381	1	1	1	551	61.135	9.73	0
Medium	P07237	Protein disulfide-isomerase OS=Homo sapiens GN=P4HB PE=1 SV=3	1.39308	1.5748	1	1	1	508	57.081	4.87	0
Medium	Q2TAY7	WD40 repeat-containing protein SMU1 OS=Homo sapiens GN=SMU1 PE=1 SV=2	1.39287	2.53411	1	1	1	513	57.507	7.18	0
Medium	P22234	Multifunctional protein ADE2 OS=Homo sapiens GN=PAICS PE=1 SV=3	1.38143	1.88235	1	1	1	425	47.049	7.23	0
Medium	O00425	Insulin-like growth factor 2 mRNA-binding protein 3 OS=Homo sapiens GN=IGF2BP3 PE=1 SV=2	1.38122	1.72712	1	1	1	579	63.666	8.87	0
Medium	P62937	Peptidyl-prolyl cis-trans isomerase A OS=Homo sapiens GN=PPIA PE=1 SV=2	1.33339	5.45455	1	1	1	165	18.001	7.81	0
Medium	Q9NR50	Translation initiation factor eIF-2B subunit gamma OS=Homo sapiens GN=EIF2B3 PE=1 SV=1	1.30338	1.99115	1	1	1	452	50.208	6.47	0
Medium	Q9H8Y5	Ankyrin repeat and zinc finger domain-containing protein 1 OS=Homo sapiens GN=ANKZF1 PE=1 SV=1	1.2786	1.79063	1	1	1	726	80.877	8.41	0
Medium	Q8N5H7	SH2 domain-containing protein 3C OS=Homo sapiens GN=SH2D3C PE=1 SV=1	1.27482	0.697674	1	1	1	860	94.352	8.07	0
Medium	Q9ULS5	Transmembrane and coiled-coil domains protein 3 OS=Homo sapiens GN=TMCC3 PE=2 SV=3	1.24642	3.56394	1	1	1	477	53.752	8.54	0
Medium	Q8IZ69	tRNA (uracil-5-)-methyltransferase homolog A OS=Homo sapiens GN=TRMT2A PE=1 SV=2	1.24413	1.76	1	1	1	625	68.682	7.94	1.77435
Medium	P23490	Loricrin OS=Homo sapiens GN=LOR PE=1 SV=2	1.23815	2.5641	1	1	1	312	25.744	8.09	1.97543
Medium	Q8NH73	Olfactory receptor 4S2 OS=Homo sapiens GN=OR4S2 PE=3 SV=2	1.21932	5.14469	1	1	1	311	35.148	8.21	0
Medium	P78362	SRSF protein kinase 2 OS=Homo sapiens GN=SRPK2 PE=1 SV=3	1.18869	1.30814	1	1	1	688	77.478	4.97	0
Medium	Q13613	Myotubularin-related protein 1 OS=Homo sapiens GN=MTMR1 PE=1 SV=4	1.18336	1.35338	1	1	1	665	74.631	7.14	1.72587
Medium	Q9NY61	Protein AATF OS=Homo sapiens GN=AATF PE=1 SV=1	1.16986	1.42857	1	1	1	560	63.094	4.94	0
Medium	Q9Y2W1	Thyroid hormone receptor-associated protein 3 OS=Homo sapiens GN=THRAP3 PE=1 SV=2	1.16431	1.04712	1	1	1	955	108.601	10.15	1.90273
Medium	Q14157	Ubiquitin-associated protein 2-like OS=Homo sapiens GN=UBAP2L PE=1 SV=2	1.14978	1.01196	1	1	1	1087	114.465	7.11	0
Medium	P24534	Elongation factor 1-beta OS=Homo sapiens GN=EEF1B2 PE=1 SV=3	1.14942	6.66667	1	1	1	225	24.748	4.67	0
Medium	Q96P11	Probable 28S rRNA (cytosine-C(5))-methyltransferase OS=Homo sapiens GN=NSUN5 PE=1 SV=2	1.13112	3.2634	1	1	1	429	46.662	8.62	1.96224
Medium	P40429	60S ribosomal protein L13a OS=Homo sapiens GN=RPL13A PE=1 SV=2	1.11623	3.94089	1	1	1	203	23.562	10.93	0
Medium	Q16629	Serine/arginine-rich splicing factor 7 OS=Homo sapiens GN=SRSF7 PE=1 SV=1	1.11132	5.88235	1	1	1	238	27.35	11.82	0
Medium	Q9UNU6	7-alpha-hydroxycholest-4-en-3-one 12-alpha-hydroxylase OS=Homo sapiens GN=CYP8B1 PE=1 SV=2	1.10852	1.59681	1	1	1	501	58.031	8.66	0
Medium	Q14008	Cytoskeleton-associated protein 5 OS=Homo sapiens GN=CKAP5 PE=1 SV=3	1.10785	0.295276	1	1	1	2032	225.352	7.8	0
Medium	Q96EY4	Translation machinery-associated protein 16 OS=Homo sapiens GN=TMA16 PE=1 SV=2	1.10133	3.44828	1	1	1	203	23.849	9.26	0
Medium	Q8IYT3	Coiled-coil domain-containing protein 170 OS=Homo sapiens GN=CCDC170 PE=1 SV=3	1.07479	1.11888	1	1	1	715	82.226	6.64	0
Medium	Q96QA5	Gasdermin-A OS=Homo sapiens GN=GSDMA PE=1 SV=4	1.06778	1.79775	1	1	1	445	49.334	5.29	1.65483
Medium	Q86VY4	Testis-specific Y-encoded-like protein 5 OS=Homo sapiens GN=TSPYL5 PE=1 SV=2	1.05735	2.39808	1	1	1	417	45.116	9.54	0
Medium	Q13224	Glutamate receptor ionotropic, NMDA 2B OS=Homo sapiens GN=GRIN2B PE=1 SV=3	1.04001	0.876011	1	1	1	1484	166.261	6.93	0
Medium	Q96HS1	Serine/threonine-protein phosphatase PGAM5, mitochondrial OS=Homo sapiens GN=PGAM5 PE=1 SV=2	1.03184	4.15225	1	1	1	289	31.985	8.68	0
Medium	P68431	Histone H3.1 OS=Homo sapiens GN=HIST1H3A PE=1 SV=2	1.0195	5.14706	1	1	1	136	15.394	11.12	0
Medium	Q9P2R3	Rabankyrin-5 OS=Homo sapiens GN=ANKFY1 PE=1 SV=2	1.01395	0.598802	1	1	1	1169	128.318	6.1	0
Medium	P07814	Bifunctional glutamate/proline--tRNA ligase OS=Homo sapiens GN=EPRS PE=1 SV=5	0.995249	0.727513	1	1	1	1512	170.483	7.33	0
Low	Q08211	ATP-dependent RNA helicase A OS=Homo sapiens GN=DHX9 PE=1 SV=4	0.992679	0.629921	1	1	1	1270	140.869	6.84	0
Low	O95071	E3 ubiquitin-protein ligase UBR5 OS=Homo sapiens GN=UBR5 PE=1 SV=2	0.9897	0.321543	1	1	1	2799	309.158	5.85	0
Low	P51148	Ras-related protein Rab-5C OS=Homo sapiens GN=RAB5C PE=1 SV=2	0.987163	5.55556	1	1	1	216	23.468	8.41	0
Low	Q9BXJ9	N-alpha-acetyltransferase 15, NatA auxiliary subunit OS=Homo sapiens GN=NAA15 PE=1 SV=1	0.971836	1.15473	1	1	1	866	101.208	7.42	0
Low	O75934	Pre-mRNA-splicing factor SPF27 OS=Homo sapiens GN=BCAS2 PE=1 SV=1	0.9694	2.66667	1	1	1	225	26.115	5.66	0
Low	P42858	Huntingtin OS=Homo sapiens GN=HTT PE=1 SV=2	0.949234	0.222788	1	1	1	3142	347.383	6.2	0
Low	Q08170	Serine/arginine-rich splicing factor 4 OS=Homo sapiens GN=SRSF4 PE=1 SV=2	0.945004	1.82186	1	1	1	494	56.645	11.52	0
Low	P00558	Phosphoglycerate kinase 1 OS=Homo sapiens GN=PGK1 PE=1 SV=3	0.933301	4.31655	1	1	1	417	44.586	8.1	0
